Indoor Air quality at a French university

1 **Indoor air quality at a French university: a participatory CO<sub>2</sub>**  
2 ***measurement campaign highlights the wide gap between reality and***  
3 ***the law***

4 Philippe Cinquin<sup>1</sup>

5 <sup>1</sup>Univ. Grenoble Alpes, CNRS, UMR 5525, VetAgro Sup, Grenoble INP, CHU Grenoble  
6 Alpes, TIMC, UMR5525, 38000 Grenoble, France.

7

8 Correspondence should be addressed to [Philippe.Cinquin@univ-grenoble-alpes.fr](mailto:Philippe.Cinquin@univ-grenoble-alpes.fr)

9 **Abstract**

10 Poor indoor air quality has been demonstrated to increase the risk of transmitting infectious  
11 agents and to expose individuals to the phenomenon of sick building syndrome. In light of  
12 these findings, most countries have established specific guidelines regarding indoor air quality  
13 in university rooms. In France, for instance, the maximum permissible concentration of carbon  
14 dioxide (CO<sub>2</sub>) in university rooms without mechanical ventilation is set at 1,300 parts per  
15 million (ppm), and the minimum volume per occupant is 15 m<sup>3</sup>. For rooms with mechanical  
16 ventilation, the minimum clean air flow rate is 25 m<sup>3</sup>/h/occupant.

17 The primary objective of this study was to design and demonstrate the feasibility of a simple,  
18 cost-effective method for comparing the reality of indoor air quality in all university rooms  
19 with legal requirements. The secondary objectives of the present study were to demonstrate the  
20 efficacy of the proposed method in identifying and reporting problematic situations, and in  
21 issuing practical recommendations.

22 Mobile CO<sub>2</sub> sensors (Aranet4) were provided to volunteer lecturers to measure the CO<sub>2</sub>  
23 concentration during and after classes. The number of occupants and the condition of openings  
24 were also recorded. These data were supplemented by measurements from 117 fixed Carbon  
25 Nexelec sensors. The data were then fitted to a model, which enabled the characterization of  
26 air quality and the estimation of the gauge reduction required to comply with the law.

27 None of the 14 rooms without mechanical ventilation complied with the legal minimum of 15  
28 m<sup>3</sup>/occupant. 75% of the third quartiles of CO<sub>2</sub> concentrations during classes exceeded 2692  
29 ppm. In rooms with mechanical ventilation, median clean air flow was 15 m<sup>3</sup>/h/occupant at  
30 100% occupancy (9 m<sup>3</sup>/h/occupant for the first quartile). In 32 out of 41 rooms with  
31 mechanical ventilation (78%), the clean air flow was estimated to be below the legal minimum  
32 of 25 m<sup>3</sup>/h/occupant at 100% occupancy. Concentrations in excess of 5,000 ppm were observed  
33 in 23 of the 101 rooms equipped with fixed sensors.

34 The proposed method has demonstrated its feasibility in real-life conditions. For the purpose  
35 of evaluating the air quality of all rooms affiliated with universities, it is recommended that  
36 this method be used in a systematic manner. The findings of this study indicate that a significant  
37 proportion of the examined rooms may not be in accordance with the relevant legislation,

**NOTE: This preprint reports new research that has not been certified by peer review and should not be used to guide clinical practice.**

## Indoor Air quality at a French university

38 thereby jeopardizing the health of the occupants. In order to comply with the law, the method  
39 proposed here to estimate gauge reduction should be applied.

40

### 41 **1. Introduction**

42 The Corona Virus Disease 2019 (CoViD-19) pandemic has drawn attention to the risk of  
43 airborne transmission of infectious agents, particularly in enclosed environments. Indeed, as  
44 early as 2020, several studies highlighted the airborne transmission of the severe acute  
45 respiratory syndrome coronavirus 2, SARS-CoV-2 [1] [2]. It therefore immediately became  
46 clear that the quality of ventilation in the workplace was an essential factor in limiting the  
47 spread of the pandemic. Indeed, several studies had confirmed that the incidence rate of  
48 airborne infectious diseases is higher in poorly ventilated premises than in well-ventilated  
49 premises [3] [4]. Since then, studies have confirmed that the installation of effective  
50 mechanical ventilation in school classrooms significantly reduces the risk of SARS-CoV-2  
51 contamination [5].

52 However, it has long been recognized that carbon dioxide (CO<sub>2</sub>) concentration can be used to  
53 assess the quality of ventilation in a room [6]. More specifically, a link has been established  
54 between a high CO<sub>2</sub> concentration and an increased risk of transmission of airborne viruses  
55 such as SARS-CoV-2 [7]. Furthermore, physico-chemical mechanisms explaining the effect  
56 on SARS-CoV-2 infectivity of even a moderate increase in CO<sub>2</sub> concentration are beginning  
57 to be elucidated [8].

58 Moreover, independently of the increased risk of transmission of airborne infections, various  
59 studies report a correlation between high CO<sub>2</sub> concentrations and various psycho-cognitive  
60 disorders, including headaches, fatigue, nausea and even dizziness. Sick Building Syndrome  
61 [9], a nosological entity recognized by the World Health Organization since 1982, brings  
62 together the various symptoms experienced by occupants of poorly ventilated buildings. These  
63 symptoms may be linked to CO<sub>2</sub> itself or to various chemical pollutants present in the  
64 atmosphere of public buildings, particularly Volatile Organic Compounds exhaled by building  
65 occupants [10], [11], [12].

66 For all these reasons, legislation in many countries sets maximum CO<sub>2</sub> concentration  
67 thresholds not to be exceeded, as well as minimum ventilation rates in rooms with mechanical  
68 ventilation, compatible with the recommendations of the American Society of Heating,  
69 Refrigerating and Air-Conditioning Engineers [6]. This is the case in France, where the  
70 following thresholds apply in universities. In university rooms with mechanical ventilation, the  
71 legal maximum CO<sub>2</sub> concentration is 1,000 parts per million (ppm), with a tolerance of up to  
72 1,300 ppm, and the minimum clean air flow per occupant is 25 m<sup>3</sup>/h/occupant. In university  
73 rooms without mechanical ventilation, there is no legal maximum CO<sub>2</sub> concentration, however  
74 a minimum volume per occupant of 15 m<sup>3</sup>/occupant is required. In two opinions [13] [14],  
75 France's highest public health authority, the HCSP (High Council for Public Health), has set a  
76 "rapid action threshold" of 1,500 ppm "*indicating unacceptable air confinement in the light of*  
77 *the scientific literature, and requiring corrective action (lowering the occupancy gauge or*  
78 *evacuating the room, modifying the technical means of aeration and ventilation)*". In a recent  
79 opinion [15], it set a maximum CO<sub>2</sub> concentration target of 800 ppm and a minimum clean air  
80 flow per occupant in mechanically ventilated rooms of 50 m<sup>3</sup>/h/occupant.

## Indoor Air quality at a French university

81 The public health benefits of working in good-quality air have therefore been demonstrated,  
82 and the legal framework guaranteeing air quality in buildings open to the public, particularly  
83 universities, is clear. However, to the best of our knowledge, no study has proposed a method  
84 for measuring indoor air quality in universities that is designed to check the compatibility of  
85 all university classrooms with the relevant legal requirements. A number of one-off studies  
86 have been carried out to characterize CO<sub>2</sub> concentrations or fresh-air ventilation rates in  
87 selected university or school classrooms (see, for example, [3] [4] [5] [16] [17]). [17]  
88 delineates three classes of methods applicable to estimating fresh air ventilation rates: direct  
89 measurement of flow, study of the decay of marker gases diffused in a controlled manner, and  
90 study of markers -in particular CO<sub>2</sub>- spontaneously emitted when rooms are used by humans.  
91 [17] characterized the ventilation of 214 rooms in seven universities or schools, most of which  
92 had mechanical ventilation. However, the majority of the estimates of ventilation performance  
93 in this study were derived from the study of the decay of marker gases, which would be  
94 incompatible with the systematic and regular estimation of all ventilation rates.

95 The primary objective of the present study was to demonstrate the feasibility of a method  
96 designed to ascertain the compatibility of all university rooms with legal requirements in terms  
97 of CO<sub>2</sub> concentration and fresh air ventilation rate. The implementation of this method on a  
98 broad scale would facilitate the determination of the CO<sub>2</sub> concentration levels attained when  
99 university rooms are utilized under real-life conditions, as well as the estimation of the  
100 performance of both natural and mechanical ventilation systems. The proposed method is  
101 sufficiently simple and inexpensive to be implemented on a very regular basis (at least once a  
102 year) in all rooms with mechanical ventilation. The air quality in these rooms is contingent on  
103 the performance of the air handling units, which exhibits variability over time due to the  
104 effectiveness of the maintenance procedures employed. This necessitates regular verification  
105 to ensure optimal functioning.

106 In order to achieve this objective, the present study applied a methodological approach to the  
107 analysis of the compatibility between the actual conditions of use of rooms in a French  
108 university, Univ. Grenoble Alpes (UGA), and the legal requirements and recommendations of  
109 the HCSP in terms of CO<sub>2</sub> levels and ventilation performance. This entailed the  
110 characterization of the distributions of CO<sub>2</sub> concentrations in all the rooms under study,  
111 contingent on their actual conditions of use, as well as the mechanical ventilation performance  
112 of the rooms that had it or the volume per occupant in rooms lacking mechanical ventilation.  
113 A secondary objective was to demonstrate that our method enables detection of situations likely  
114 to endanger the health of users and alert the administrators of the universities. The third  
115 objective was to demonstrate the feasibility of using the proposed method to provide practical  
116 recommendations to university administrators regarding indoor air quality.

117 It swiftly became evident that to accomplish our objectives, it was imperative to collect not  
118 only CO<sub>2</sub> values, but also data regarding actual room occupancy conditions (particularly the  
119 number of occupants and the state of door and window openings). These data are not readily  
120 available in the information systems of universities. While room reservation systems at  
121 universities facilitate the identification of rooms allocated for specific classes, the accuracy of  
122 predicting student attendance remains a challenge. While a network of fixed CO<sub>2</sub> sensors offers  
123 valuable insights, it is not sufficient for the study's objectives.

124 The collection of information necessary to achieve our objectives necessitates the commitment  
125 of teaching staff. This necessity led to the formulation of the original concept of a "participatory  
126 CO<sub>2</sub> measurement campaign". This concept is predicated on the principle of involving UGA

## Indoor Air quality at a French university

127 staff in measuring CO<sub>2</sub> (using portable sensors) and collecting data on actual classroom  
128 occupancy conditions.

## 129 **2. Materials and Methods**

### 130 **2.1 Launch of a “participatory CO<sub>2</sub> measurement campaign”**

131 On October 23, 2023, the SNESUP-FSU union used its electronic mailing list for UGA staff  
132 to invite them to take part in a campaign to study CO<sub>2</sub> under real conditions in UGA rooms.  
133 The pdf document to which they were directed presented the interest and objectives of the  
134 study, the commitments to be made in order to participate, how the results would be shared,  
135 and described the information to be gathered on the measurement conditions, as well as the  
136 method for implementing the sensor and sharing the measurements. Each participant had  
137 access to a personal section of the UGA cloud, where they could upload their CO<sub>2</sub> measurement  
138 files for each session, as well as the file describing the measurement conditions. A reservation  
139 file accessible to all participants made it possible to reserve a sensor and to contact the  
140 colleague who had reserved it before and the colleague who had reserved it afterwards (so that  
141 participants could transmit sensors to each other, without centralized intervention). In the final  
142 part of the study, those who could were asked to leave the sensor in place for at least an hour  
143 after the end of the human presence in the room, with all openings closed.

### 144 **2.2 Collecting room usage conditions as part of the “participatory campaign”**

145 For each measurement session, each participant was asked to record the conditions of use of  
146 the room in a pre-determined format set out in an Excel template. This file asked for the  
147 following information: name of building, name of room, room gauge  $J$ , existence of mechanical  
148 ventilation, position of sensor, date, start time, end time, number of people in the room (as a  
149 function of time), state of opening of doors and windows (as a function of time), and if possible,  
150 room dimensions. Free-format observations could be added. For some rooms, measurements  
151 of room dimensions were taken using a Dexter laser rangefinder (accuracy  $\pm 2$  mm), enabling  
152 the area  $A$  and volume  $V$  of the room to be estimated.

### 153 **2.3 CO<sub>2</sub> measurements**

#### 154 **2.3.1 CO<sub>2</sub> measurements using the “participatory campaign”**

155 Four Aranet4 sensors were made available to participants. These sensors complied with the  
156 recommendations of the French Environment Code [18] for CO<sub>2</sub> measurements (measurement  
157 by non-dispersive infrared absorption spectrometry, measurement range 0 to 5,000 ppm;  
158 measurement uncertainty  $\pm [30 \text{ ppm} + 3\% \text{ of reading}]$ ). They measure CO<sub>2</sub> concentrations in  
159 ppm. They had been calibrated in accordance with the manufacturer's recommended procedure.  
160 This procedure consists of installing the sensor in a place where the CO<sub>2</sub> concentration is close  
161 to 420 ppm. In order to be as close as possible to this value, the calibration was performed  
162 outdoors in an environment with adequate wind exposure, sparsely built-up, far from industrial  
163 activities and car traffic, with the sensor positioned at a distance from plants. The procedure is  
164 initiated from the application installed on a mobile phone and requires no intervention other  
165 than starting the calibration and waiting for it to complete (which takes about 15 minutes).  
166 Regular calibration checks were carried out, verifying that at certain times of the day they  
167 measured outdoor concentrations between 420 and 470 ppm. No recalibration was necessary.  
168 These lightweight, portable sensors record one measurement per minute, and digitally transfer

## Indoor Air quality at a French university

169 the data in .csv format to a smartphone via an app that can be downloaded from any app store.  
170 Spot measurements were taken outside teaching buildings by some participants.

### 171 **2.3.2 Access to data collected by fixed UGA sensors**

172 CO<sub>2</sub> measurements from the “participatory campaign” were enriched by data captured by 117  
173 Carbon Nexelec sensors deployed by the UGA. These sensors take a reading every 10 minutes  
174 and transmit their data over a private wireless long-range wide area network. The UGA makes  
175 all these measurements available to its staff, via its intranet, on a Grafana® platform.

### 176 **2.4 Transfer of measurement conditions and measurements**

177 The app downloaded by each participant onto their smartphone enabled them to transfer the  
178 measurement file to their personal computer via the application of their choice. For each  
179 measurement session, the participant uploaded two files to the personal section of the UGA  
180 cloud assigned to him/her: the CO<sub>2</sub> measurement file, in .csv format; and the Excel file  
181 containing the measurement conditions.

### 182 **2.5 Processing data from the “participatory campaign”**

#### 183 **2.5.1 Processing data measured during room occupancy**

184 For each measurement session, an Excel interpretation file was created, containing both the  
185 measurement conditions and the measurements themselves. A graph of the CO<sub>2</sub> curve versus  
186 time was generated, also showing the HCSP target values (800 and 1,500 ppm), the legal value  
187 (1,300 ppm), and the thresholds of 2,500 and 4,000 ppm. The following parameters were  
188 systematically calculated for each session, when the necessary information was available:  
189 gauge  $J$ , median  $N$  of the number of occupants, occupancy rate  $R_{Occ} = N/J$ , volume per occupant  
190 when  $R_{Occ} = 100\%$   $V_J = V/J$ , median of CO<sub>2</sub>,  $Q_3$  value of the third quartile of CO<sub>2</sub>, portion of  
191 the duration of the session spent with CO<sub>2</sub> > 1,500 ppm and with CO<sub>2</sub> > 2,500 ppm, clean air  
192 flow per occupant  $D_N$  when  $N$  occupants are present in the room (so  $D_J$  is the clean air flow per  
193 occupant when  $R_{Occ} = 100\%$ ), total clean air flow  $D$  in the room.

194 In order to estimate  $D_N$ , the classical model of CO<sub>2</sub> concentration in a well-mixed space was  
195 utilized [19]. This model states that, in a room with  $N$  occupants,

$$196 \quad (1) \quad c(t) = \left( \frac{D_{exp}}{D_N} + c_{ext} \right) (1 - e^{-kt}) + c(0)e^{-kt}$$

197 where  $c(t)$  is the concentration of CO<sub>2</sub> at time  $t$ ,  $D_{exp}$  is the average CO<sub>2</sub> generation rate by  
198 human beings,  $c_{ext}$  is the concentration of CO<sub>2</sub> outside the building, and  $k = \frac{D}{V}$  is the air  
199 renewal rate. As a consequence, when  $c(t)$  reaches a steady state  $c_{limit}$

$$200 \quad (2) \quad c_{limit} = \frac{D_{exp}}{D_N} + c_{ext}$$

201 hence

## Indoor Air quality at a French university

202 (3) 
$$D_N = \frac{D_{exp}}{c_{limit} - c_{ext}}$$

203

204 This model requires an estimation of  $D_{exp}$ , the average CO<sub>2</sub> generation rate by human beings.  
205 This rate has been determined to be 20.2 L/h [20]. We propose to estimate  $c_{limit}$  by  $Q_3$ . The  
206 reasons for these choices of the estimations of  $D_{exp}$  and of  $Q_3$  are discussed in section 4.1.2. As  
207 a consequence, if  $c_{ext}$  is expressed in ppm,  $D_N$  (m<sup>3</sup>/h) was estimated by

208 (4) 
$$D_N = \frac{20,200}{Q_3 - c_{ext}}$$

209 As a consequence,

210 (5) 
$$D = ND_N = N \frac{20,200}{Q_3 - c_{ext}}$$

211

212 (6) 
$$D_J = \frac{D}{J} = \frac{N}{J} \frac{20,200}{Q_3 - c_{ext}}$$

213 For university rooms without mechanical ventilation, French law imposes  $V_J \geq 15$  m<sup>3</sup>/occupant.  
214 Accordingly, the legal gauge can be defined as  $J_{Legal} = \min [J ; J V_J / 15]$ . Although there is no  
215 legal maximal value of CO<sub>2</sub> in university rooms in France, the HCSP Gauge  $J_{HCSP}$  can be  
216 defined as the maximal number of occupants not to overpass the 1,500 ppm threshold  
217 recommended by HCSP. The previously mentioned model of CO<sub>2</sub> concentration in a well-  
218 mixed space implies that, if the CO<sub>2</sub> limit concentration is 1,500 ppm, the minimum flow of  
219 clean air per occupant  $D_{HCSP}$  satisfies  $D_{HCSP} = 20,200 / (1,500 - c_{ext})$ , where  $c_{ext}$  is the outdoor  
220 concentration. From this it can be deduced that  $J_{HCSP} = \min [J ; J D_J / D_{HCSP}]$ .

221 Since the true value of the outdoor CO<sub>2</sub> concentration was rarely available, we opted to  
222 overestimate  $D$  by using the maximum value of CO<sub>2</sub> measured outdoors (500 ppm), and to  
223 underestimate  $D_{HCSP}$  by using the minimum possible value (417 ppm, world average CO<sub>2</sub>  
224 concentration [21]). These choices all maximize the estimate of the  $J_{HCSP}$  gauge. The reasons  
225 for this choice will be discussed in section 4.1.2.

226 For rooms with mechanical ventilation, French law imposes  $D_J \geq 25$  m<sup>3</sup>/occupant in  
227 universities. The legal gauge can then be defined as  $J_{Legal} = \min [J ; J D_J / 25]$ .

### 228 2.5.2 Processing data measured after room occupancy, with openings closed

229 The participant had to leave the CO<sub>2</sub> sensor in the room for at least 1 hour, after the room had  
230 been used and CO<sub>2</sub> had risen above the concentration outside the building. Equation (1) can be  
231 written as  $c(t) = ae^{-kt} + c_{ext}$ . When  $c_{ext}$  had been measured, this value was used. Otherwise,  
232  $c_{ext}$  was assumed to be 500 ppm (this leads to a limited overestimation of  $k$ , that will be  
233 discussed in section 4.1.2). To estimate parameters  $a$  and  $k$ , Excel's SLOPE and INTERCEPT  
234 functions were used, on data  $\{t_i ; \ln(c(t_i) - c_{ext})\}$ . Quality of fit was estimated by the

## Indoor Air quality at a French university

235 correlation coefficient between measurements and model predictions, obtained by Excel's  
236 CORREL function. Time being expressed in minutes, when the volume  $V$  of the room and its  
237 gauge  $J$  were known, the clean air flow per occupant at 100% occupancy was obtained by the  
238 formula  $D_J=60 kV/J$ . The legal gauge  $J_{Legal}$  is here also estimated by  $J_{Legal} = \min [J ; J D_J/25]$ .

### 239 **2.6 Comparison of the results of the participatory campaign with data from sensors** 240 **deployed by the UGA**

241 In order to corroborate the results obtained by the participatory campaign, the measurements  
242 taken by the UGA sensors from September 2022 to June 2023 were utilized. The study was  
243 conducted in rooms where at least one measurement exceeded 5,000 ppm. Grafana® software  
244 was used to represent the CO<sub>2</sub> concentration in these rooms over this period. From March 26  
245 to April 16, 2024, the investigation's primary focus was on analyzing rooms with CO<sub>2</sub> levels  
246 exceeding 5,000 ppm. For these cases, Grafana's .csv export function was employed, and the  
247 corresponding data were then exported to Excel. It was hypothesized that the human presence  
248 in these rooms would be characterized by a CO<sub>2</sub> concentration exceeding 550 ppm. For each  
249 of these rooms, a summary plot was produced, displaying the CO<sub>2</sub> concentrations above 550  
250 ppm as a function of time. It was hypothesized that a quasi-linear decrease of  $\log (C_{measured} -$   
251  $C_{ext})$  over more than an hour after a CO<sub>2</sub> peak would indicate that the room was empty. To  
252 this end, the aforementioned method was employed to estimate the clean air renewal rate and  
253 the clean air flow per occupant at 100% occupancy. It is noteworthy that UGA's Carbon Next  
254 sensors have an upper measurement limit of 5,000 ppm. The utilization of the model was  
255 undertaken for the purpose of predicting the maximum CO<sub>2</sub> value in the room during the  
256 "plateau" measured by the sensor. To this end, if time  $t = 0$  corresponds to the start of decay,  
257 the model  $C(t) = ae^{-kt} + C_{ext}$  was employed with negative  $t$  times. The value of time  
258 corresponding to the actual end of room use was estimated using UGA's room reservation  
259 management software. In this situation, it is interesting to plot not only the mean value of the  
260 model, but also its 95% confidence interval. The 95% confidence intervals for coefficients  $a$   
261 and  $k$  were estimated using Excel's "Data Analysis / Linear Regression" function. The  
262 production of two curves—low and high predictions—allowed the delineation of the 95%  
263 confidence interval for the predictions.

## 264 **3 Results**

### 265 **3.1 Involvement in the participatory campaign**

266 The participatory campaign involved 20 UGA staff, mainly from October 19, 2023 to  
267 December 21, 2023, with some additional measures in 2024. Three “participatory campaign  
268 letters” were distributed to participants, on November 1 and December 8, 2023, and February  
269 21, 2024. CO<sub>2</sub> was measured in 77 room-use sessions, in a total of 56 rooms in 21 buildings.

### 270 **3.2 Conditions of the measurements of the participatory campaign**

271 Most of the measurements were taken during a relatively cold period (midday temperature:  
272 October = 16°C; November = 6°C; December = 7°C). As a consequence, the heating was  
273 working, and the occupants were rather reluctant to open the windows. None of the rooms  
274 studied had air conditioning. The CO<sub>2</sub> sensor was switched on by the teacher just before the  
275 course (by insertion of the batteries in the device). It was systematically placed on the teacher's  
276 desk, at a distance of at least one meter from the teacher. At the end of the course, the teacher

## Indoor Air quality at a French university

277 uploaded the CO<sub>2</sub> measurement on his or her mobile phone, then on his or her personal section  
278 of the UGA cloud. Then the CO<sub>2</sub> sensor was switched off by removing batteries.

### 279 **3.3 Compliance with legal requirements and HCSP recommendations in rooms without** 280 **mechanical ventilation surveyed by the participatory campaign**

281 CO<sub>2</sub> concentrations were studied in 20 classroom sessions in 15 rooms without mechanical  
282 ventilations, in 9 buildings of UGA. The volume was known for 14 of these 15 rooms. Table 1  
283 summarizes the data recorded to estimate  $J_{Legal}$  (legal gauge to meet the legal minimum of 15  
284 m<sup>3</sup>/occupant). As can be seen from Table 1, none of these 14 rooms complied with the legal  
285 minimum of 15 m<sup>3</sup>/occupant.

286 Table SM.1 from the supplementary material summarizes the CO<sub>2</sub> measurements made during  
287 the participatory campaign in the 15 rooms without mechanical ventilation, and the estimations  
288 of  $J_{HCSP}$  (recommended gauge not to overpass the 1,500 ppm threshold recommended by  
289 HCSP).



| <b>Building</b> | <b>Room</b> | <b>Gauge</b> | <b>Area (m<sup>2</sup>)</b> | <b>Volume (m<sup>3</sup>)</b> | <b>Volume / Gauge (m<sup>3</sup>)</b> | <b>% of the legal threshold of 15 m<sup>3</sup>/occupant</b> | <i>J<sub>Legal</sub></i><br><i>(Legal Gauge to comply with the legal threshold of 15 m<sup>3</sup>/occupant)</i> | <b>% of Gauge reduction</b><br><i>(to comply with the legal threshold of 15 m<sup>3</sup>/occupant)</i> |
|-----------------|-------------|--------------|-----------------------------|-------------------------------|---------------------------------------|--------------------------------------------------------------|------------------------------------------------------------------------------------------------------------------|---------------------------------------------------------------------------------------------------------|
| G               | f           | 59           | 61                          | 153                           | 2.6                                   | 17%                                                          | 10                                                                                                               | 83%                                                                                                     |
| G               | b           | 44           | 54                          | 135                           | 3.1                                   | 20%                                                          | 9                                                                                                                | 80%                                                                                                     |
| F               | a           | 24           | 29                          | 82                            | 3.4                                   | 23%                                                          | 5                                                                                                                | 77%                                                                                                     |
| G               | a           | 41           | 58                          | 144                           | 3.5                                   | 23%                                                          | 10                                                                                                               | 77%                                                                                                     |
| I               | a           | 17           | 25                          | 68                            | 4                                     | 27%                                                          | 5                                                                                                                | 73%                                                                                                     |
| B               | a           | 45           | 66                          | 199                           | 4.4                                   | 29%                                                          | 13                                                                                                               | 71%                                                                                                     |
| G               | d           | 42           | 77                          | 191                           | 4.5                                   | 30%                                                          | 13                                                                                                               | 70%                                                                                                     |
| E               | a           | 31           | 56                          | 153                           | 4.9                                   | 33%                                                          | 10                                                                                                               | 67%                                                                                                     |
| G               | e           | 70           | 144                         | 360                           | 5.1                                   | 34%                                                          | 24                                                                                                               | 66%                                                                                                     |
| H               | a           | 30           | 60                          | 180                           | 6                                     | 40%                                                          | 12                                                                                                               | 60%                                                                                                     |
| C               | a           | 35           | 79                          | 249                           | 7.1                                   | 47%                                                          | 17                                                                                                               | 53%                                                                                                     |
| G               | c           | 37           | 90                          | 270                           | 7.3                                   | 49%                                                          | 18                                                                                                               | 51%                                                                                                     |

Indoor Air quality at a French university

|   |   |    |     |     |      |     |    |     |
|---|---|----|-----|-----|------|-----|----|-----|
| A | a | 48 | 140 | 420 | 8.8  | 58% | 28 | 42% |
| J | a | 22 | 80  | 240 | 10.9 | 73% | 16 | 27% |

291 **Table 1.** Summary of volume per occupant for the 14 rooms without mechanical ventilation for which the volume was known (sorted by the  
292 Volume / Gauge ratio), enabling estimation of the legal gauge required to respect the legal threshold of 15 m<sup>3</sup>/occupant.

## Indoor Air quality at a French university

293 The main parameters characterizing CO<sub>2</sub> distribution in these rooms are synthesized in Table  
 294 2. In particular, 75% of the third quartiles of CO<sub>2</sub> concentrations measured during room  
 295 occupancy sessions were above 2,692 ppm.

| Parameter of CO <sub>2</sub> distribution in the observed sessions | Minimum | Q <sub>1</sub> | Q <sub>2</sub> | Q <sub>3</sub> | Maximum |
|--------------------------------------------------------------------|---------|----------------|----------------|----------------|---------|
| 3rd quartile CO <sub>2</sub> (ppm)                                 | 861     | 1675           | 2175           | 2692           | 3988    |
| max CO <sub>2</sub> (ppm)                                          | 886     | 2194           | 2660           | 2871           | 4393    |
| portion of time above 800 ppm                                      | 85%     | 97%            | 100%           | 100%           | 100%    |
| portion of time above 1,300 ppm                                    | 0%      | 52%            | 87%            | 98%            | 100%    |
| portion of time above 1,500 ppm                                    | 0%      | 42%            | 79%            | 97%            | 100%    |

296 **Table 2.** Synthetic description of the main parameters characterizing the distribution of CO<sub>2</sub>  
 297 measurements in the 15 rooms without mechanical ventilation.

298 Typical examples of the effect of ventilation are shown in Figures 1 and 2.

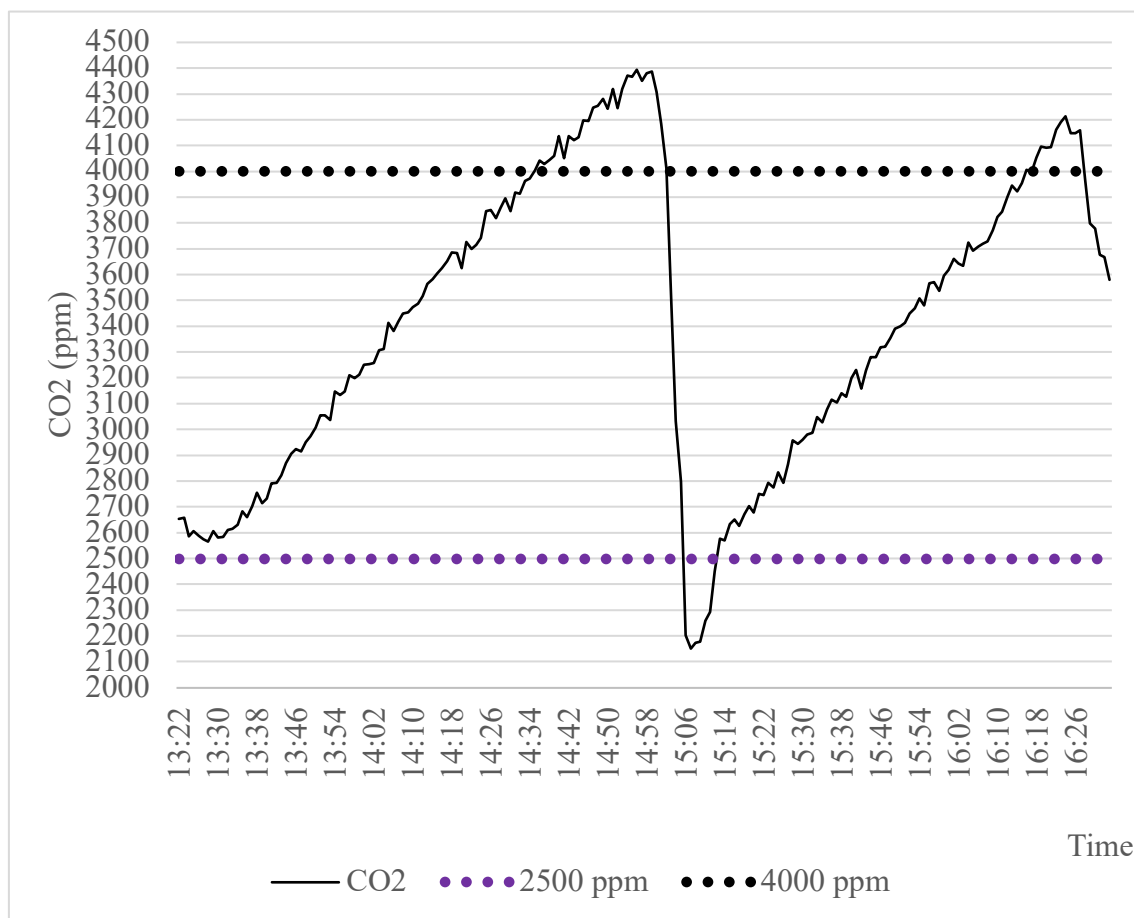

299

## Indoor Air quality at a French university

300 **Figure 1.** Typical example of CO<sub>2</sub> growth in room Aa, a room of 420 m<sup>3</sup> (14 m x 10 m x 3 m),  
301 with a gauge of 48, without mechanical ventilation. All three doors and 5 windows were closed  
302 during the two sessions. 21 students and one teacher were present (19 m<sup>3</sup>/occupant, 46% of  
303 gauge). During the 15 minutes break, one door and two windows were opened, and 11 students  
304 left the room.

305

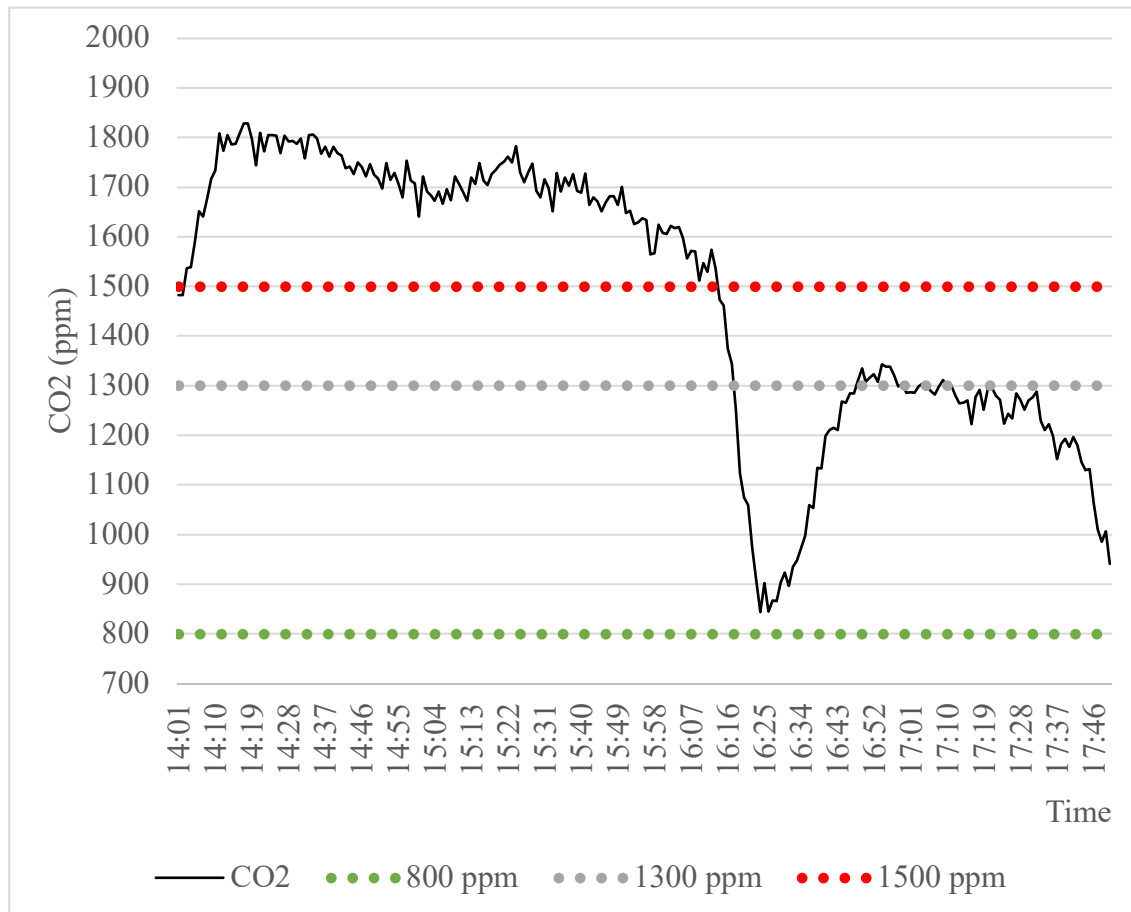

306

307

308 **Figure 2.** Illustration of the importance of a draught, even when windows are open. Room Ia is  
309 67.5 m<sup>3</sup> (5 m x 5 m x 2.7 m), with a gauge of 17. 20 persons were present (118 % of the gauge).  
310 The volume per occupant is 3.4 m<sup>3</sup>/occupant, which is 23% of the legal minimum of 15  
311 m<sup>3</sup>/occupant. The only door is closed during the sessions, and the 4 windows are open. The  
312 opening of the windows keeps CO<sub>2</sub> at a plateau (which is however above the HCSP  
313 recommendation of 1,500 ppm). During the break, the installation of a draught by opening of  
314 the door significantly reduces the CO<sub>2</sub> concentration.

### 315 3.4 Compliance with legal requirements and HCSP recommendations in the mechanically 316 ventilated rooms surveyed by the participatory campaign

#### 317 3.4.1 Study of data collected during room use

## Indoor Air quality at a French university

318 CO<sub>2</sub> concentrations were studied during 57 classroom sessions in 41 mechanically ventilated  
 319 rooms in 15 UGA buildings. The main parameters describing characteristics and room  
 320 occupancy, CO<sub>2</sub> distribution and mechanical ventilation performance in these rooms are  
 321 synthesized in Table 3.

322

|                                                                                                                                    | Minimum | $Q_1$ | $Q_2$ | $Q_3$ | Maximum |
|------------------------------------------------------------------------------------------------------------------------------------|---------|-------|-------|-------|---------|
| <b>Characteristics of the measurement sessions</b>                                                                                 |         |       |       |       |         |
| Room volume (m <sup>3</sup> )                                                                                                      | 62      | 126   | 178   | 900   | 1360    |
| Room area (m <sup>2</sup> )                                                                                                        | 21      | 50    | 70    | 215   | 323     |
| Gauge                                                                                                                              | 15      | 32    | 41    | 180   | 300     |
| Occupancy (median number of occupants / Gauge)                                                                                     | 21 %    | 32 %  | 40 %  | 63%   | 102 %   |
| Session duration (min)                                                                                                             | 75      | 90    | 120   | 120   | 240     |
| <b>Parameter of CO<sub>2</sub> distribution in the observed sessions</b>                                                           |         |       |       |       |         |
| 3rd quartile CO <sub>2</sub> (ppm)                                                                                                 | 571     | 955   | 1188  | 1434  | 2152    |
| max CO <sub>2</sub> (ppm)                                                                                                          | 658     | 1056  | 1292  | 1697  | 2344    |
| <b>Mechanical ventilation performance in the observed sessions</b>                                                                 |         |       |       |       |         |
| clean air flow per occupant at 100% occupancy (m <sup>3</sup> / h / occupant)                                                      | 3       | 9     | 15    | 24    | 91      |
| Percentage of clean air flow per occupant at 100% occupancy, with respect to the legal airflow of 25 m <sup>3</sup> / h / occupant | 13 %    | 35 %  | 60 %  | 94 %  | 363%    |

323 **Table 3.** Synthetic description of room characteristics and occupancy, CO<sub>2</sub> distribution and  
 324 mechanical ventilation, in 57 classroom sessions in 41 rooms with mechanical ventilation, in  
 325 15 UGA buildings.

326 In 47 out of the 57 classroom sessions (82%), the clean air flow at 100% occupancy was  
 327 estimated below the legal threshold of 25 m<sup>3</sup>/h/occupant at 100% occupancy. In 32 out of the  
 328 41 rooms (78%), at least one session led to an estimation of a clean air flow at 100% occupancy  
 329 below 25 m<sup>3</sup>/h/occupant. Figure 3 shows a typical measurement in a 300-seat, 1,360 m<sup>3</sup>  
 330 amphitheatre, occupied to 32% of gauge.

### Indoor Air quality at a French university

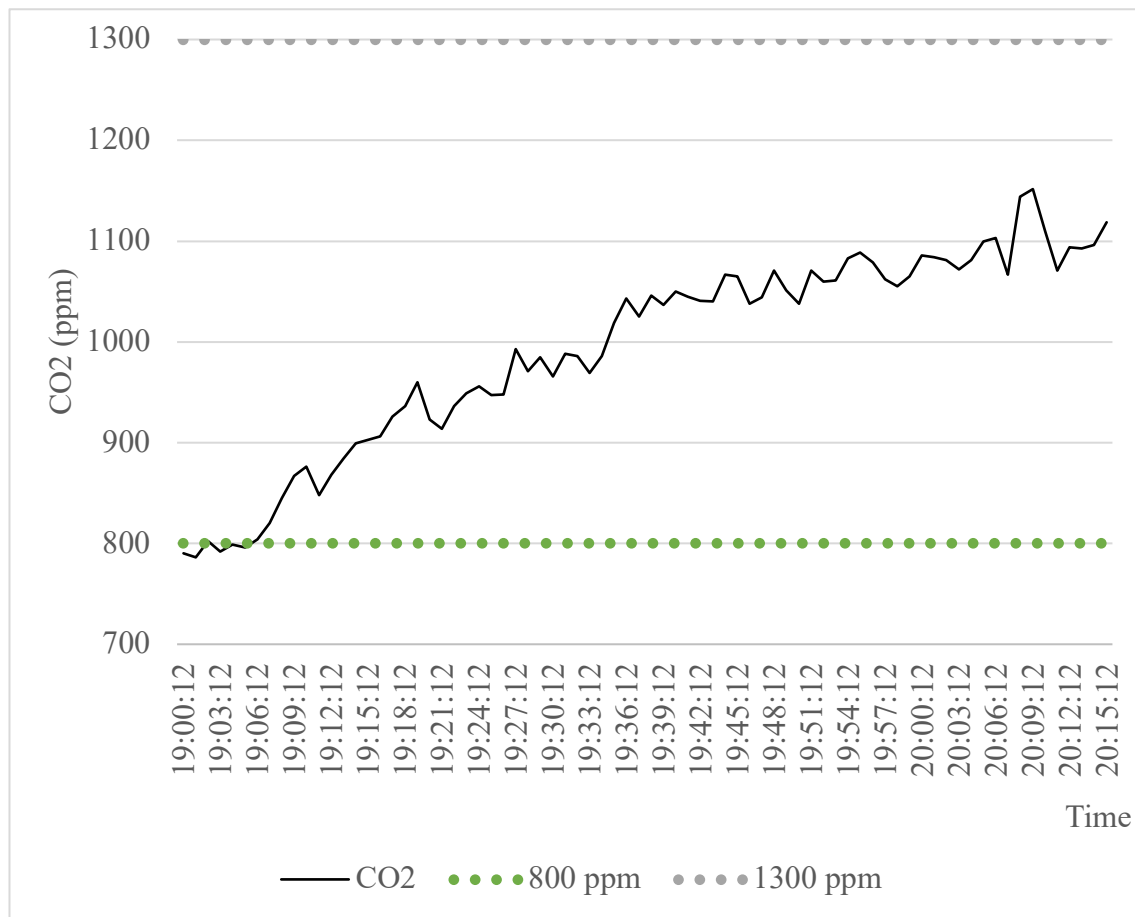

331  
332  
333  
334  
335  
336  
337

**Figure 3.** Typical CO<sub>2</sub> profile in room Ta, a room of 1,360 m<sup>3</sup> occupied by 95 people for a gauge of 300 (32% occupancy). 3<sup>rd</sup> quartile of CO<sub>2</sub> = 1071 ppm. Clean air flow during session = 35 m<sup>3</sup>/h/occupant. Clean air flow at 100% occupancy = 11 m<sup>3</sup>/h/occupant. Percentage of gauge reduction required to meet legal airflow of 25 m<sup>3</sup> / hour / occupant at 100% occupancy = 55% (78% to reach the 50 m<sup>3</sup>/h/occupant target of HCSP).

#### 338 3.4.2 Study of CO<sub>2</sub> decay data after room use

339 The decay of the CO<sub>2</sub> concentration was studied subsequent to the cessation of room use and  
340 the closure of all apertures in nine rooms (including one, the Ne amphitheatre, before and after  
341 repair of the air handling unit). The results obtained are presented in Table 4. Figures 4 and 5  
342 show the decay curves for amphitheatre Ne, before and after repair of the air handling unit.

343

| Build<br>ing | Ro<br>om | Ga<br>uge | Volu<br>me<br>(m <sup>3</sup> ) | Correl<br>ation<br>coeffici<br>ent | Renewal<br>rate<br>(volume /<br>hour) | clean air flow<br>(m <sup>3</sup> / hour /<br>occupant)<br>at 100%<br>occupancy | portion of<br>legal airflow<br>per occupant<br>at 100%<br>occupancy |
|--------------|----------|-----------|---------------------------------|------------------------------------|---------------------------------------|---------------------------------------------------------------------------------|---------------------------------------------------------------------|
| N            | e        | 240       | 1040                            | 0.994                              | 0.04                                  | 0.2                                                                             | 1%                                                                  |

### Indoor Air quality at a French university

|   |   |     |      |       |      |      |     |
|---|---|-----|------|-------|------|------|-----|
| T | b | 125 | 377  | 0.976 | 0.3  | 0.9  | 4%  |
| N | b | 240 | 1040 | 0.990 | 0.84 | 3.6  | 14% |
| L | f | 176 | 900  | 0.995 | 0.73 | 3.7  | 15% |
| G | f | 122 | 390  | 0.982 | 1.4  | 4.5  | 18% |
| T | a | 300 | 1360 | 0.990 | 1.1  | 5.0  | 20% |
| T | c | 125 | 434  | 0.990 | 2.2  | 7.6  | 30% |
| P | a | 72  | 470  | 0.985 | 1.8  | 11.8 | 47% |
| N | e | 240 | 1040 | 0.996 | 4.6  | 19.9 | 80% |
| W | a | 120 | 710  | 0.991 | 3.5  | 20.7 | 83% |

344 **Table 4.** Summary of ventilation performance estimates (sorted by portion of legal airflow per  
345 occupant at 100% occupancy) based on analysis of CO<sub>2</sub> decay after evacuation of the  
346 amphitheatres and closure of openings.

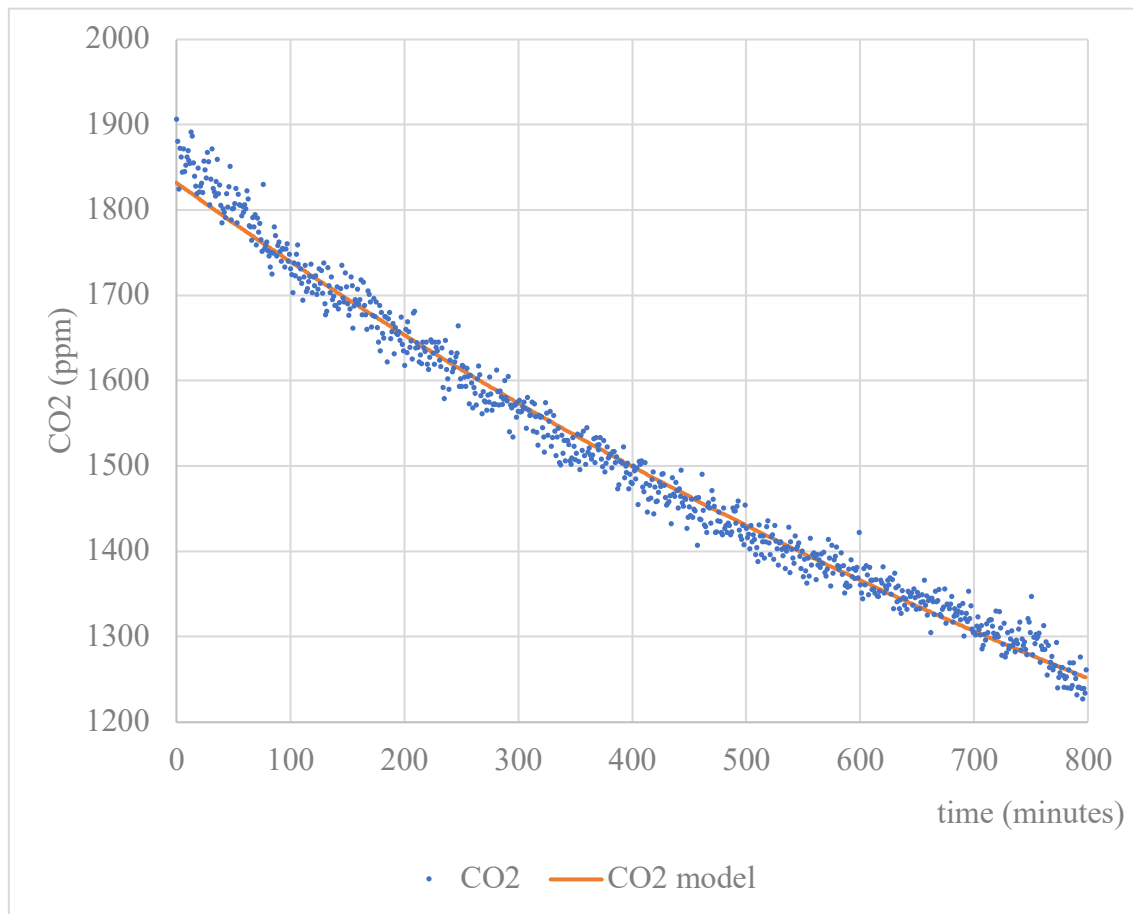

347  
348 **Figure 4.** Model of CO<sub>2</sub> removal in room Ne, a room of 1,040 m<sup>3</sup> with a gauge of 240 (room  
349 emptied after use, all doors and windows closed) during one night (800 minutes).  $r = 0.994$ .  
350 Renewal rate = 0.04 volume/h. Clean air flow per occupant at 100% occupancy = 0.2  
351 m<sup>3</sup>/h/occupant (< 1% of the regulatory floor).

## Indoor Air quality at a French university

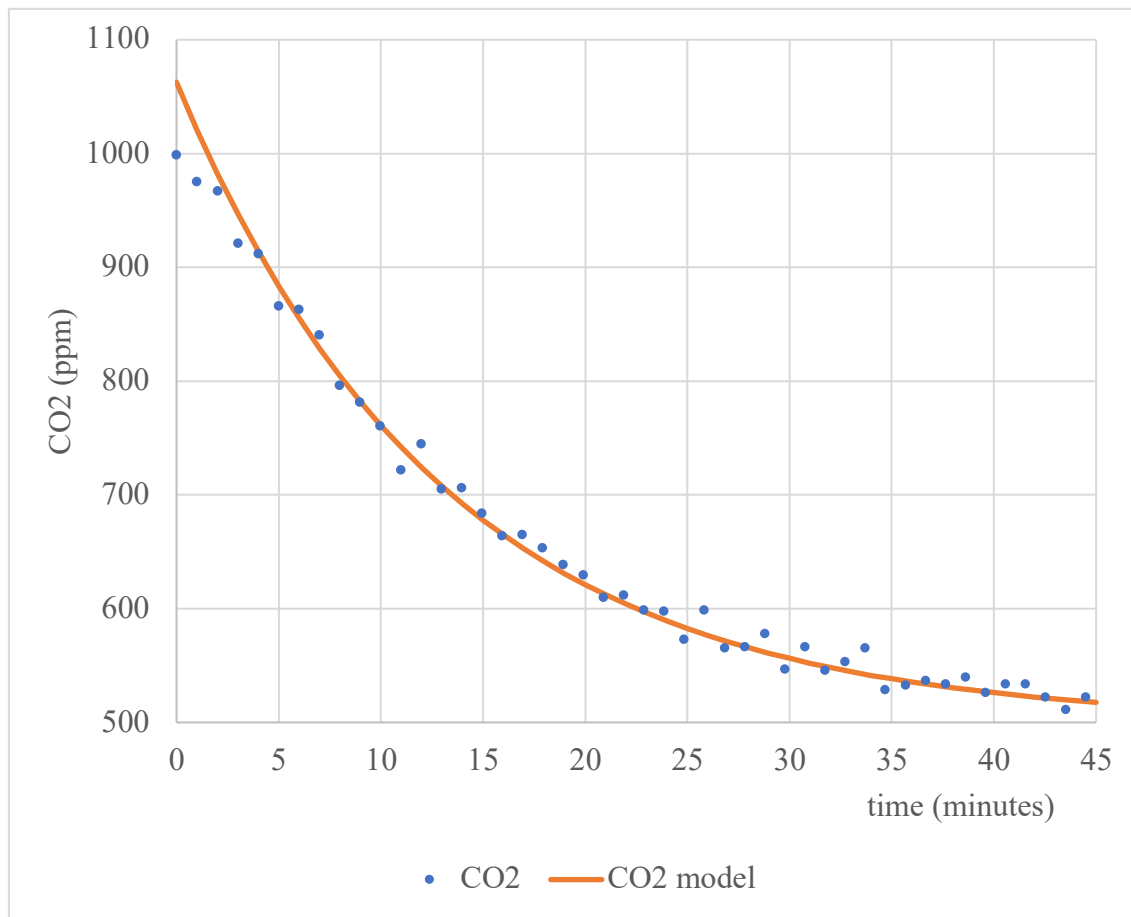

352

353 **Figure 5.** Model of CO<sub>2</sub> removal in room Ne, a room of 1,040 m<sup>3</sup> with a gauge of 240 (room  
354 emptied after use, all doors and windows closed) during 45 minutes.  $r = 0.996$ . Renewal rate =  
355 4.6 volume/h. Clean air flow per occupant at 100% occupancy = 20 m<sup>3</sup>/h/occupant (80% of the  
356 lower legal limit). *Note: This measurement was made after the air handling unit was repaired.*

### 357 **3.5 Compliance with legal requirements and HCSP recommendations in the rooms** 358 **surveyed by the UGA sensors**

359 Over the period from September 2022 to June 2023, the UGA deployed 117 CO<sub>2</sub> sensors in 101  
360 rooms. Of these 101 rooms, 23 had concentrations greater than 5,000 ppm (15 in rooms without  
361 mechanical ventilation, 8 in rooms with mechanical ventilation). Figure 6 shows the peaks of  
362 CO<sub>2</sub> above 2,500 ppm observed in one of these rooms.



363

364

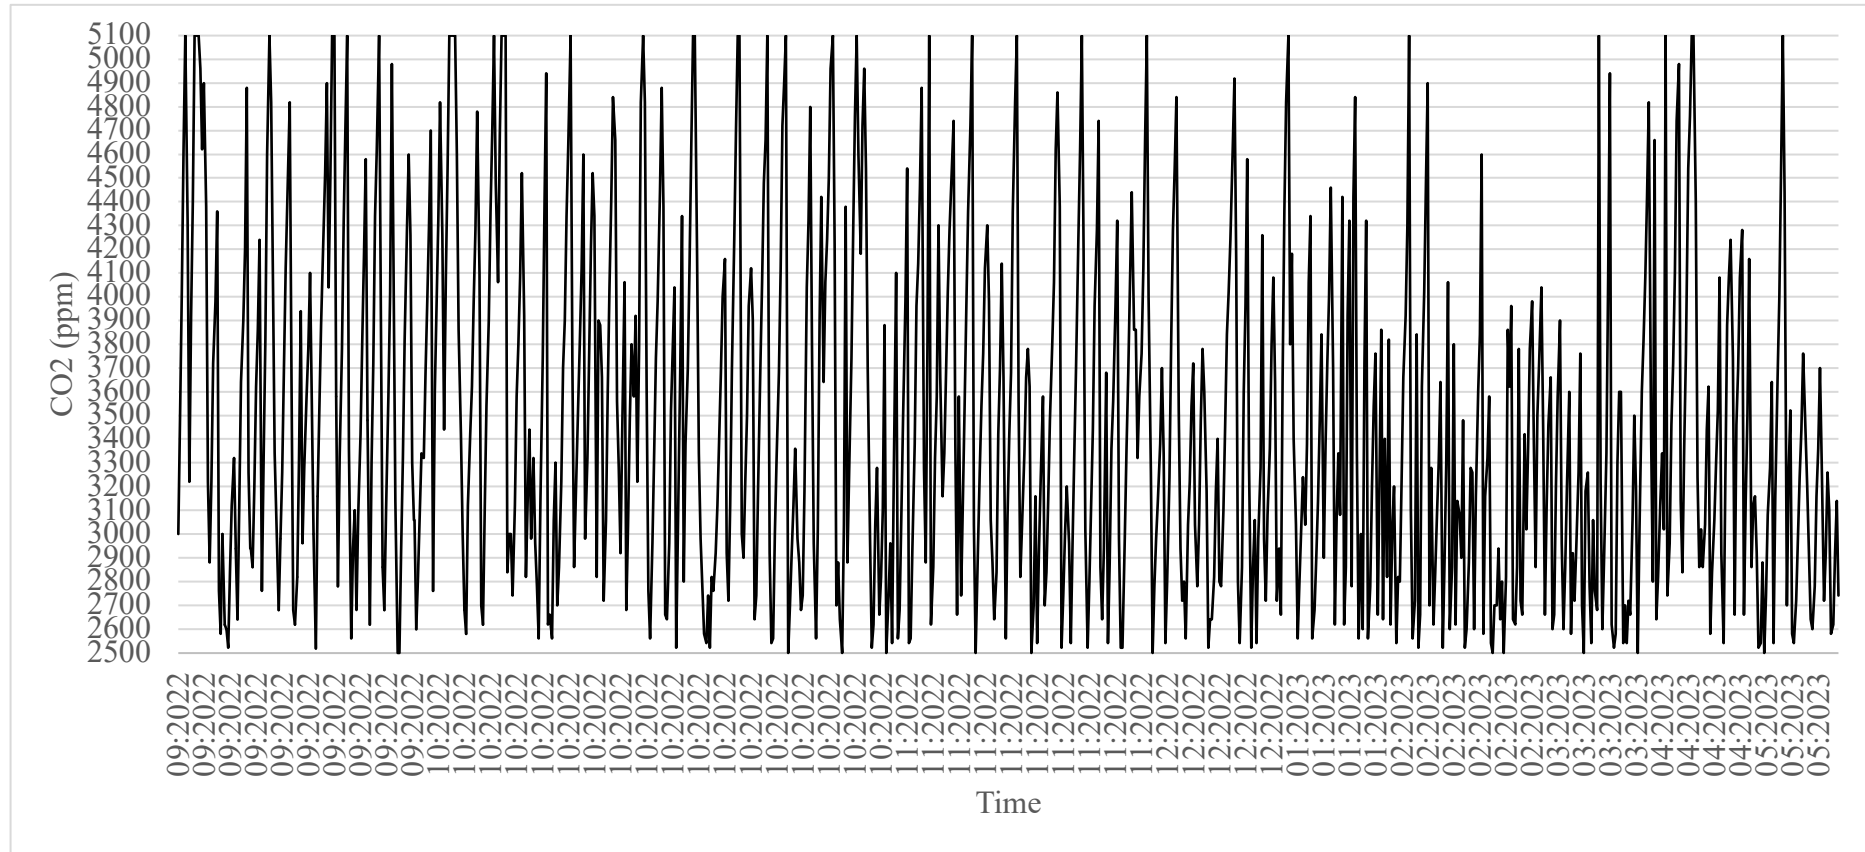

365

366 **Figure 6.** 94 CO<sub>2</sub> peaks above 2,500 ppm (28 of which above 5,000 ppm) were observed between September 2022 and June 2023, in one of the  
367 23 UGA classroom (out of 101 monitored) where peaks above 5,000 ppm were measured (only values above 2,500 ppm were plotted in this graph).  
368 This room has a gauge of 44 occupants, an area of 51.8 m<sup>2</sup>, and a volume of 140 m<sup>3</sup> (3.2 m<sup>3</sup>/occupant).

## Indoor Air quality at a French university

369 Over the period from 26 March to 16 April 2024 (3 weeks), 5 lecture theatres (i.e. 31% of the  
370 16 lecture theatres with more than 100 seats where the UGA had installed sensors) had CO<sub>2</sub>  
371 peaks above 2,500 ppm. Room Xa was a room where very high CO<sub>2</sub> concentrations were  
372 observed most frequently and was therefore monitored more carefully. Figure 7 summarizes  
373 the CO<sub>2</sub> peaks observed during the occupation of room Xa in a 4 days week, from April 29 to  
374 May 2 (May 1<sup>st</sup> is a holiday in France).

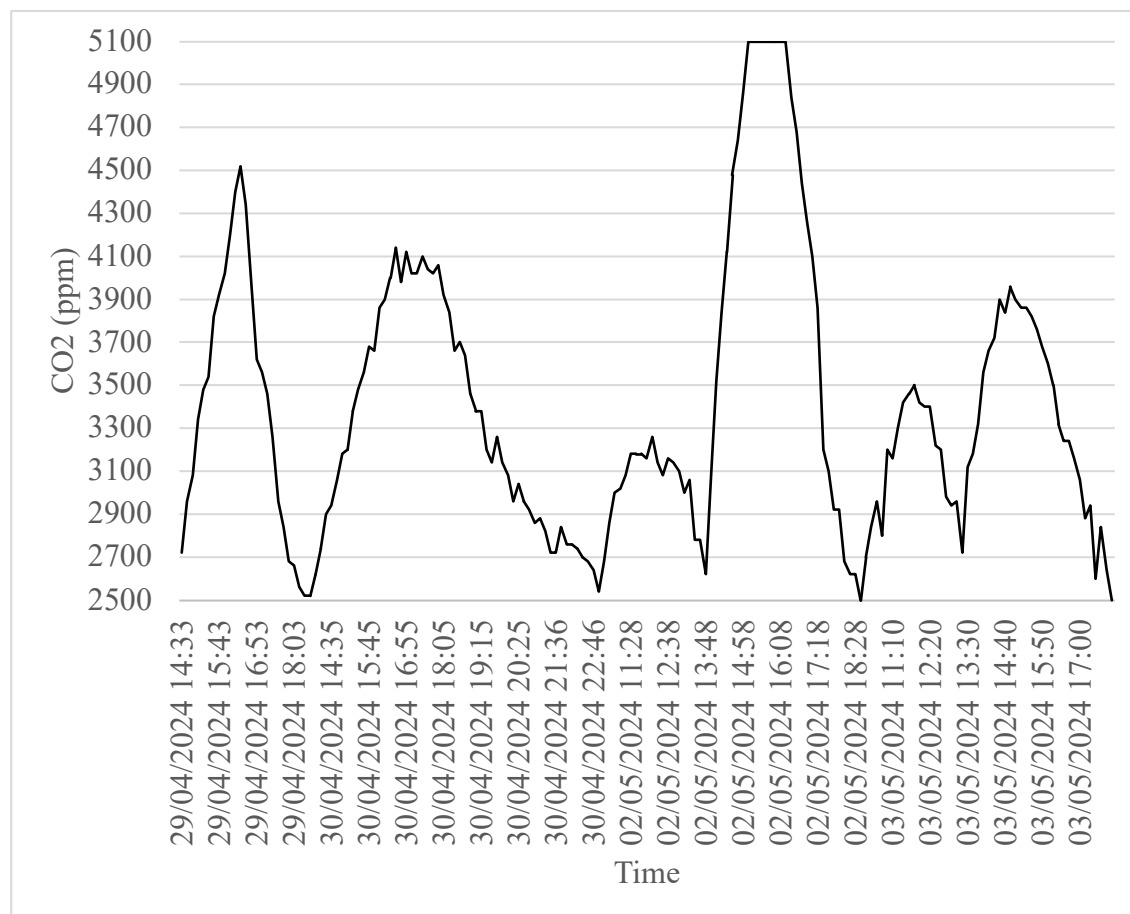

375

376 **Figure 7.** Summary of the 6 CO<sub>2</sub> peaks above 2,500 ppm observed in room Xa in a 4 working  
377 days week (from March 29 to May 2, 2024). Only values above 2,500 ppm were plotted in this  
378 graph. This room has a gauge of 154 occupants, an area of 128 m<sup>2</sup>, and a volume of 434 m<sup>3</sup>  
379 (2.8 m<sup>3</sup>/occupant). See photos of this room in Figure SM.1.

380 By studying the decrease in CO<sub>2</sub> levels after the CO<sub>2</sub> peak, it was possible to estimate their  
381 clean air renewal rates, and where the volume could be estimated, their clean air flow per  
382 occupant at 100% occupancy (Table 5).

Indoor Air quality at a French university

| Building | Room | Gauge | Volume (m <sup>3</sup> ) | Renewal rate (volume / hour) | clean air flow (m <sup>3</sup> / hour / occupant) at 100% occupancy | portion of legal airflow per occupant at 100% occupancy |
|----------|------|-------|--------------------------|------------------------------|---------------------------------------------------------------------|---------------------------------------------------------|
| V        | C    | 335   | 900                      | 0,12                         | 0,32                                                                | 1%                                                      |
| O        | B    | 108   | 337                      | 0,15                         | 0,47                                                                | 2%                                                      |
| V        | B    | 348   | 900                      | 0,2                          | 0,52                                                                | 2%                                                      |
| X        | a    | 154   | 434                      | 0,5                          | 1,41                                                                | 6%                                                      |
| W        | A    | 124   | 631                      | 1,4                          | 7,12                                                                | 28%                                                     |

383 **Table 5.** Clean air renewal rate and clean air flow per occupant at 100% occupancy in 5 lecture theatres with more than 100 seats where the UGA  
 384 had installed sensors and where peaks above 2,500 ppm were observed. Clean air flow was estimated by modelling the decay of CO<sub>2</sub> concentrations.

## Indoor Air quality at a French university

385 In one particular case, a long CO<sub>2</sub> plateau at over 5,000 ppm was observed. In this case, it was  
386 possible to use the CO<sub>2</sub> decay model to estimate that the maximum concentration of CO<sub>2</sub> to  
387 which the occupants of this lecture theatre were exposed was between 8,840 ppm and 10,608  
388 ppm, depending on the actual end time of the examination, which was scheduled for 4:30 pm,  
389 but may have been delayed (Figure 8).

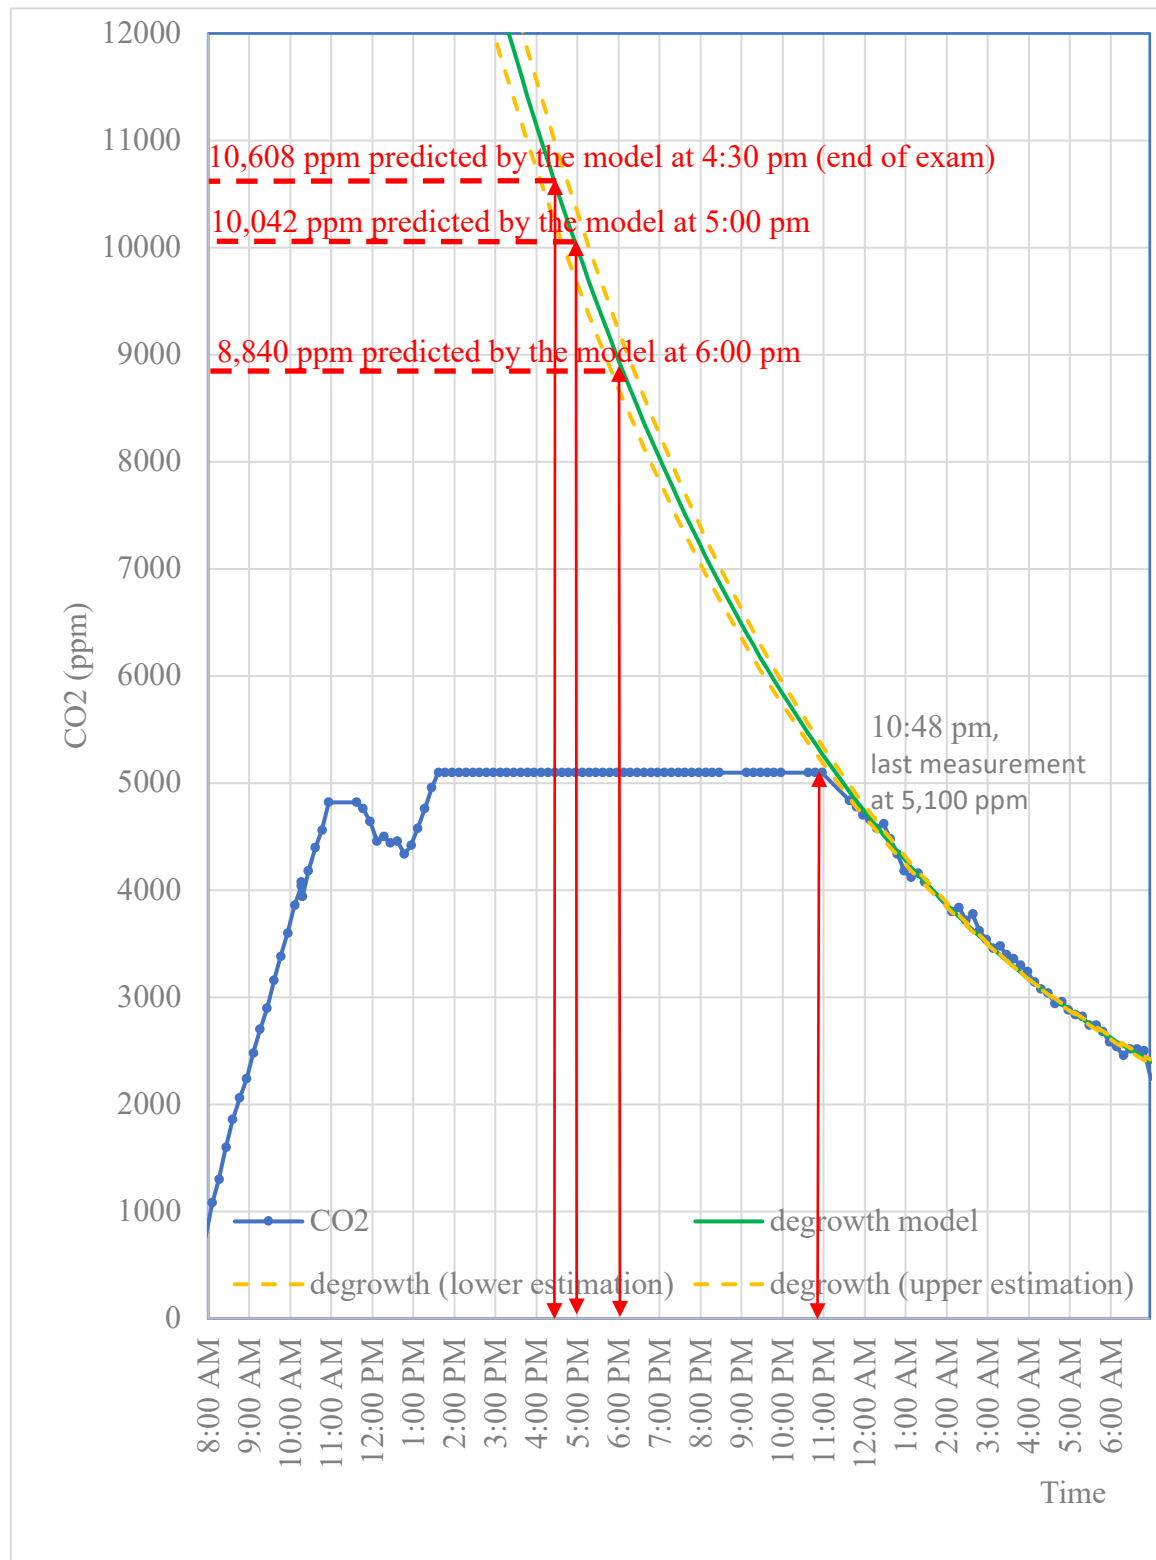

390

391 **Figure 8.** Growth, then degrowth of CO<sub>2</sub> levels in room c of building V (area = 255 m<sup>2</sup>, volume  
392 = 990 m<sup>3</sup>, gauge = 335). The upper limit of the sensor is 5,000 ppm. Degrowth model is  
393 estimated from 22:58 to 6:59 (43 measurements,  $r = 0.997$ ). The dotted lines correspond to the  
394 lower and upper limits of the 95% confidence interval.

## 395 **4 Discussion**

### 396 **4.1 Applicability of the proposed method to identify dangerous situations and to propose** 397 **practical recommendations**

#### 398 **4.1.1 Involvement of the lecturers**

399 The involvement of the lecturers made it possible to collect precise data on the number of  
400 occupants and the condition of the openings (all the measurement files sent were accompanied  
401 by the required details on this point). The lecturers taking part in the study reported no  
402 difficulties in collecting this information, which is a major advantage over processing data from  
403 fixed sensors installed in the rooms, with no information on the number of occupants or the  
404 state of the openings. Using the mobile CO<sub>2</sub> sensors made available to the teachers proved very  
405 easy, with all of them having no difficulty installing the necessary application on their mobile  
406 phones. Transferring the measurements and information about the measurement conditions to  
407 the cloud made available to them posed no particular problem either. The study also raised  
408 participants' awareness of the need for better ventilation in premises with insufficient natural  
409 ventilation, and of the reality of the problem of insufficient mechanical ventilation in many  
410 rooms.

#### 411 **4.1.2 Uncertainty of the estimation of the indicators of air quality from our measurements**

412 As described in sections 2.5.1 and 2.5.2, the clean air flow is estimated on the basis of CO<sub>2</sub>  
413 measurements, using the classical model of CO<sub>2</sub> concentration in a well-mixed space [19]. CO<sub>2</sub>  
414 measurements are known with an uncertainty of  $\pm (30 \text{ ppm} + 3\% \text{ of reading})$ , which  
415 corresponds to  $\pm 5\% \text{ ppm}$  for a concentration of 1,500 ppm (and between 3 and 5% for higher  
416 concentrations).

417 For estimations of air flow based on CO<sub>2</sub> measurements while the room is occupied, the CO<sub>2</sub>  
418 growth model operates under the assumption of homogeneous mixing of the air within the  
419 room. However, it is well known that CO<sub>2</sub> concentrations can vary from one point of the room  
420 to another, depending on natural convective air movements [22], especially when an air current  
421 is established after opening windows or doors, or on the proximity of room occupants [23].  
422 These differences can reach 10% of measurements [24]. Therefore, the optimal scenario would  
423 involve the strategic placement of multiple CO<sub>2</sub> sensors throughout the room, whereas only a  
424 single sensor was utilized per session of measurements. Given the utilization of a single sensor  
425 in each session, the total uncertainty in the CO<sub>2</sub> measurements was considered to be  $\pm 15\%$   
426 (5% due to the sensor uncertainty, 10% due to the inhomogeneity).

427 In order to estimate the limit concentration of CO<sub>2</sub>, that was reached at steady state, the third  
428 quartile  $Q_3$  of CO<sub>2</sub> measurements obtained during a session of room use was utilized in  
429 Equation (4) – rather than the maximum – for two reasons. Firstly, this approach excluded  
430 potential outliers. Secondly, this deliberate overestimation of the clean air flow ensured that  
431 rooms considered incompatible with the law truly were. This approach was also adopted to  
432 determine the outdoor concentration of CO<sub>2</sub>, which was set at 500 ppm, representing the

433 highest concentration measured. The utilization of  $Q_3$  as opposed to the maximum of  $CO_2$   
434 offers a distinct advantage, namely the fact that the associated uncertainty is considerably less  
435 pronounced in comparison to the uncertainty inherent in discrete  $CO_2$  measurements.  
436 Nonetheless, the estimation of the uncertainty on  $Q_3$  will be maintained at 15%. Given that  
437 Equation (4) utilized to estimate the clean air flow we use model is  $D_N = 20,200/(Q_3 - 500)$ , an  
438 uncertainty of  $\pm 15\%$  in  $Q_3$  yields an uncertainty of  $D_N$  inferior to 22.5% when  $Q_3 \geq 1,500$  ppm.

439 Another source of uncertainty comes from estimating the average  $CO_2$  generation rate by the  
440 human beings present in the room. The value of 5.6 mL/s (or 20.2 L/h) was utilized, as proposed  
441 by the Air Infiltration and Ventilation Centre [20]. This value is compatible with the inhalation  
442 rates used by [25] for different activity levels (0.49 m<sup>3</sup>/h for resting, 0.54 m<sup>3</sup>/h for standing),  
443 which, taking into account an average  $CO_2$  concentration of 4% [26] correspond to 19.6 L/h  
444 and 21.6 L/h, respectively. However, other publications suggest lower  $CO_2$  generation rates.  
445 For example, [27] suggests an average value of 16.2 L/h for a classroom of 64 students and  
446 one teacher, and [28] considers that an activity of “sitting reading, writing, typing” corresponds  
447 to a metabolism of 1.3 times the basal metabolism, corresponding to an average value of 18.0  
448 L/h. Once more, we elected to overestimate the clean air flow, which consequently guided our  
449 decision to utilize the estimate proposed by [20].

450 The variability of estimates of average human  $CO_2$  production rates underscores the importance  
451 of preferring the  $CO_2$  decay method. In addition, during decay measurements, the risk of  
452 mixture inhomogeneity is reduced because all openings are closed and the room is empty, so  
453 the uncertainty is also reduced with this method. Finally, the fact that the model is fitted to all  
454 measurements also reduces the uncertainty. This explains why the confidence interval of the  
455 decay model is small, as can be seen in Figure 8. For all these reasons, this method should be  
456 used whenever possible.

#### 457 **4.1.3 Reliability of the estimation of the indicators used to characterize violations of legal** 458 **requirements for air quality**

459 Analysis of the estimated clean air flows shows that an underestimation of 22.5% of the clean  
460 air flow would lead to classifying 24 instead of 32 (59% instead of 78%) of the 41 rooms with  
461 mechanical ventilation as uncompliant with the legal minimum of 25 m<sup>3</sup>/h/occupant. Such an  
462 error would have no practical consequences. In fact, universities do not have the resources to  
463 immediately address all air handling unit deficiencies in more than half of their mechanically  
464 ventilated rooms, so an error in the classification of 20% of the rooms will not have major  
465 consequences: university administrators will have to work first on improving their worst rooms  
466 in terms of air quality.

#### 467 **4.1.4 Comparison of flow estimates during room occupancy and $CO_2$ decay**

468 In rooms with mechanical ventilation, where the clean air flow per occupant could be estimated  
469 both by estimating the limit concentration of  $CO_2$  at steady state and by modelling the decay  
470 of  $CO_2$  after evacuation of the room and closure of the openings, the estimate obtained by the  
471 first method was systematically higher than that obtained by the second. The first reason for  
472 this difference is that steady state is often not reached before the end of the session. A second  
473 reason is the deliberate choice of the 3<sup>rd</sup> quartile of  $CO_2$  concentrations as the limit value, which  
474 was justified in the previous section. Finally, in certain circumstances, opening of doors and  
475 windows provides more clean air than mechanical ventilation. It is therefore not surprising that  
476 the estimate obtained after evacuating the room and closing the openings is systematically

477 lower than that obtained in real conditions, where the openings can be opened. This is  
478 illustrated by the example of room Ne, where the clean air flow was estimated during 6  
479 classroom sessions. The 6 estimates of clean air flow (in m<sup>3</sup>/h/occupant at 100% occupancy)  
480 for this room are 3.5, 4.0, 4.3, 4.6, 5.4, 8.1. The relative homogeneity of the first 5 estimates  
481 should be noted, with the estimate of 8.1 m<sup>3</sup>/h/occupant appearing to be an outlier. These  
482 measurements were obtained when the mechanical ventilation in this 240-seat auditorium was  
483 not operational. This auditorium has the unusual feature of having 3 doors, which were open  
484 (two main doors at the bottom of the amphitheatre, opening onto a patio where a large number  
485 of students may walk, and where the CO<sub>2</sub> concentration can therefore vary significantly, and a  
486 third at the very top, opening onto a corridor). A slight draught was felt by the lecturer at the  
487 bottom of the amphitheatre. The estimated clean air flow per occupant for this same room using  
488 the decay method (Figure 4) is 0.2 m<sup>3</sup>/h/per occupant at 100% occupancy. It can be seen that  
489 opening the doors provides a significant flow of clean air, although it is far from sufficient.

490 Estimating the flow of clean air at 100% occupancy using the CO<sub>2</sub> decay method after  
491 evacuating the room and closing the doors proved particularly simple to implement. The first  
492 tests of this method were carried out on the Ne room, when its mechanical ventilation was  
493 down. As a result, the sensor had to be left in place overnight to observe a sufficient drop in  
494 CO<sub>2</sub>, which posed practical constraints when it came to retrieving it the following morning.  
495 But when the mechanical ventilation is working more or less correctly, measurements over an  
496 hour or so after the doors have been closed are sufficient. However, it is difficult to ask a  
497 lecturer to stay for an hour after the end of the lesson. Extending this method to all classrooms  
498 would therefore require institutional mobilisation, with the involvement of the building  
499 maintenance staff.

500 For rooms with mechanical ventilation, this method of modelling CO<sub>2</sub> decay seems the simplest  
501 to implement, for rapidly characterising all the rooms with mechanical ventilation in a  
502 university. By simply taking this measurement after the end of the last lesson of each day, it is  
503 possible with one sensor to characterise 20 rooms in one month, i.e. around 20 working days.  
504 For an investment of around €2,000, or 10 sensors, 200 rooms could be characterised each  
505 month, at the cost of a moderate human investment (a maximum of ten minutes to transmit and  
506 process each series of measurements characterising a room). However, this requires  
507 institutional mobilisation and political will.

## 508 **4.2 Detecting situations likely to endanger the health of users and alerting the university** 509 **administration**

510 Well before the launch of the participatory campaign, several warnings about the poor quality  
511 of the air in the university had been issued, including warnings about risks to the health of staff  
512 and students, without any solutions to the problems identified being implemented. The  
513 participatory campaign was launched to assess the scale of the problem across the whole  
514 university.

### 515 **4.2.1 Risk situations in rooms without mechanical ventilation**

516 Table 1 shows that none of the studied rooms meets the legal limit of at least 15 m<sup>3</sup>/occupant.  
517 Of the 14 rooms without mechanical ventilation in our study, where the volume was known, to  
518 meet this minimum:

519 - 2 rooms (14%) should reduce their gauge by less than 50%,

520 - 6 rooms (43%) should reduce their gauge by between 50 and 70%,

521 - 6 rooms (43%) should reduce their gauge by more than 70%.

522 As early as December 2023, the participatory campaign demonstrated that failure to comply  
523 with the minimum volume per occupant in rooms without mechanical ventilation led very  
524 quickly (typically within 15 minutes), when the openings (doors and windows) were closed, to  
525 the threshold of 1,300 ppm being exceeded, with regular measurements of over 4,000 ppm, and  
526 even 5,000 ppm, as Table SM.1, Table 2, and Figures 1, 2 and 6 amply demonstrate. Figure 7  
527 illustrates the frequency with which 2,500 ppm concentrations are exceeded in a 154-seat  
528 amphitheatre (2.8 m<sup>3</sup>/occupant) without mechanical ventilation.

529 Of course, the method used in no way allows us to claim that the 15 rooms without mechanical  
530 ventilation studied by the participatory measurement campaign are representative of the  
531 situation in all the university's rooms. They were not chosen at random; these were the rooms  
532 where the campaign volunteers taught. However, the observations of the participatory  
533 campaign are compatible with the analysis of the data from the fixed CO<sub>2</sub> sensors. It is very  
534 worrying to note that, as table 2 shows, in 52% of cases, the first quartile of CO<sub>2</sub> concentrations  
535 measured in these rooms exceeded the threshold of 1,300 ppm (and 97% of this first quartile  
536 exceeded the threshold of 800 ppm recommended by the HCSP). These rooms, which have no  
537 mechanical ventilation, are usually of relatively limited gauge (typically designed for 30 to 40  
538 occupants, and are usually classrooms for tutorials or practical work). However, there is at least  
539 one case where a 154-seat lecture theatre has no mechanical ventilation. This is room Xa, where  
540 the volume per occupant is 2.8 m<sup>3</sup>/occupant, or 19% of the legal minimum threshold of 15  
541 m<sup>3</sup>/occupant (see Figure SM.1 for photos and plans of this room). Under these conditions, it is  
542 not surprising that plateaus of over 5,000 ppm for more than an hour are regularly recorded  
543 there, even with an occupancy rate of less than 50%. Such levels have been observed in  
544 particular during examination periods. This is particularly problematic in view of publications  
545 showing a decline in psychomotor and cognitive abilities at concentrations above 1,000 ppm,  
546 and especially above 2,500 ppm [29] [10], as well as an increase in the rate of headaches [10]  
547 [12].

548 Our campaign therefore suggests that any room without mechanical ventilation that does not  
549 meet the threshold of 15 m<sup>3</sup>/occupant should be considered hazardous to the health of  
550 occupants, as long as the openings cannot be permanently opened when the room is in use.

#### 551 **4.2.2 Risk situations in rooms with mechanical ventilation**

552 Here again, our methodology cannot guarantee that all 41 rooms in 15 of the university's  
553 buildings are representative. However, it is noteworthy that if the legal minimum of clean air  
554 flow of 25 m<sup>3</sup>/h/occupant is considered the objective, a mere nine of the 41 rooms examined  
555 (22%) would not necessitate a reduction in gauge. Conversely, if the objective is to adhere to  
556 the most recent HCSP recommendation (a minimum clean air flow of 50 m<sup>3</sup>/h/occupant,  
557 corresponding to a maximum CO<sub>2</sub> concentration of approximately 800 ppm), it is observed  
558 that merely two of the 41 rooms meet this criterion (with doors of these two rooms open to the  
559 outside during the session). Consequently, in order to adhere to the recommendations outlined  
560 by the HCSP, it is imperative that at least 39 of the 41 rooms under consideration undergo a  
561 reduction in gauge, with 35 of these rooms required to undergo a reduction greater than 70%.  
562 It should also be remembered that the estimates of clean air flow during classroom sessions are  
563 deliberately "optimistic" for the reasons discussed in section 4.1.2, and that measuring the flow



564 of clean air per occupant using the CO<sub>2</sub> decay method would certainly give even more drastic  
565 estimates of the reduction in gauge.

#### 566 **4.2.3 The university's ability to respond to air quality alerts**

567 The university has two levers at its disposal to reduce the risk to which its staff and students  
568 are exposed as a result of poor indoor air quality. The first of these levers is technical, and can  
569 be activated when the problem arises from a malfunction in the air handling units. This was the  
570 case for the Ne amphitheatre. When the relevant university departments intervened, it was  
571 found that the air handling unit in this amphitheatre had stopped working. Simply restarting it  
572 brought about a considerable improvement in the flow of clean air per occupant, which rose  
573 overnight from 0.2 m<sup>3</sup>/h/occupant to 20 m<sup>3</sup>/h/occupant (80% of the legal minimum of 25  
574 m<sup>3</sup>/h/occupant, and 40% of the HCSP recommendation of 50 m<sup>3</sup>/h/occupant).

575 The second lever is political and organisational. The university needs to become aware of the  
576 seriousness of the public health problem posed by the quality of its indoor air. In reality, despite  
577 explicit advice from the country's highest public health authority, the HCSP, the message is  
578 struggling to get through. Such awareness would provide the means to detect malfunctions in  
579 the air handling units and correct them where possible, as well as defining a policy for adapting  
580 the use of rooms, which could be used to improve indoor air quality.

581 The fixed sensors deployed by the university have the advantage of constantly monitoring the  
582 CO<sub>2</sub> concentration in the rooms equipped with them. This is very useful for detecting  
583 malfunctions in the air handling units. However, during the course of our study, no one was  
584 responsible for sounding the alarm if the thresholds were exceeded. Thus, it was within the  
585 framework of the study described here that analysis of the CO<sub>2</sub> signal recorded continuously  
586 in the Vc amphitheater (see Figure SM.2 for photos and plans of this room) made it possible to  
587 detect the shutdown of the air handling unit in this building, the consequences of which are  
588 summarized in Figure 8. This shutdown during an examination led to considerable exceedances  
589 of the legal thresholds, with probably a peak of CO<sub>2</sub> concentration around 10,000 ppm. Such  
590 levels are utterly unacceptable, particularly during an examination period when students are  
591 mobilizing all their cognitive capacities. It has previously been noted that these capacities are  
592 diminished above 1,000 ppm, and more specifically above 2,500 ppm. At 10,000 ppm, the risk  
593 of contamination by airborne infectious agents is considerably increased (21% of the air  
594 breathed in comes from the occupants' lungs). But direct toxicity must also be considered. This  
595 is characterized by the Occupational Exposure Limit (OEL), which must not be exceeded for  
596 8 hours (OEL 8h) or for 15 minutes (Short Term OEL). The 8h OEL for CO<sub>2</sub> is 5,000 ppm  
597 [30]. Short Term OEL values vary from country to country (10,000 ppm in Germany, 30,000  
598 ppm in the USA, France has not defined one). The concentrations shown in Figure 8 are  
599 therefore particularly problematic.

600 It should also be possible to put in place a suitable organisation to prevent the recurring risks  
601 of CO<sub>2</sub> limits being exceeded. Once again, the example of the Vc amphitheatre is typical. In  
602 building V, the air handling unit stopped working due to a malfunction in the dialogue between  
603 this unit and the fire detection system. This dialogue regularly leads to the air handling unit  
604 shutting down, which can only be restarted by the intervention of a member of staff. Despite  
605 repeated warnings, it has not been possible to arrange for the CO<sub>2</sub> concentration in the two  
606 lecture theatres in Building V with fixed CO<sub>2</sub> sensors to be read at least daily. This is how the  
607 incident summarised in Figure 8 occurred, even though reading the signals from these sensors  
608 several days before the examination summarised in Figure 8 would have made it possible to

609 detect the shutdown of the air handling unit and therefore to restart it before the examination  
610 that led to the 10,000 ppm peak. Several weeks before the incident summarised in Figure 8, the  
611 authorities had been asked to put in place a procedure to ensure that the CO<sub>2</sub> sensors in this  
612 building were checked twice a day and that action was taken immediately to restart the air  
613 handling unit in the event of an unexpected shutdown. The alert had even been given 48 hours  
614 before the examination summarised in Figure 8. No measures were taken to protect the  
615 occupants. Worse still, although a specific alert had been filed following this incident on the  
616 official register, a new similar incident occurred a few weeks later, with the 5,000 ppm limit  
617 value again being exceeded during an examination.

618 The university also needs to organize itself to react to a known systemic risk. Signals showing  
619 the reality and seriousness of the problem in a large proportion of the rooms at UGA had been  
620 available at the highest levels of the university since July 2022. The poor quality of the indoor  
621 air was discussed on numerous occasions by the university's specialist risk management bodies,  
622 without appropriate corrective or preventive action being systematically taken in line with the  
623 HCSP recommendations for CO<sub>2</sub> levels in excess of 1,500 ppm. Figures similar to those in  
624 Figure 6 have been discussed several times at the highest level, without the university's website  
625 mentioning the existence of the problem, and without appropriate warning measures being  
626 systematically taken (for example, during months, most of the rooms concerned did not display  
627 a poster warning of the existence of a danger, encouraging users to open the openings as much  
628 as possible, asking people entering the room to use a surgical mask at the slightest sign of  
629 respiratory infection, and suggesting that immuno-compromised people protect themselves).  
630 No decision was taken to reduce the gauge of the rooms, even in the face of major inadequacies.  
631 Amphitheatre Xa, for example, continued to be used to accommodate students in conditions  
632 that regularly led to considerable breaches of the legal thresholds (up to more than 5,000 ppm,  
633 see Figure 7), even though the failure to comply with the minimum threshold of 15 m<sup>3</sup>/occupant  
634 for this room without mechanical ventilation should have led to the 154-seat gauge being  
635 reduced to 29.

636 Finally, when a malfunction is reported in a particular room, it is important to organise a rapid  
637 response. The university has a specific register in which its staff can officially report any risk  
638 to their health or that of their colleagues and students. In our experience, this register did not  
639 allow for rapid reactions when exceedances of the legal CO<sub>2</sub> thresholds were reported. For  
640 example, an initial informal alert following a CO<sub>2</sub> measurement in lecture theatre Ne was  
641 issued in January 2022. As this alert did not lead to any action being taken, a second alert was  
642 filed on the ad hoc register in January 2023, which was also not acted upon. A third alert was  
643 filed in January 2024. This alert was initially closed by the administration, which considered  
644 that the problem was already known. The staff member concerned had to challenge this  
645 decision to close the alert before the university's health and safety committee. A specialist was  
646 finally sent to check the operation of the air handling unit, found that it had been shut down,  
647 and restarted it. This highlights how difficult it is for a university to listen to the alarm signals  
648 it receives.

#### 649 **4.3 Practical recommendations to the administrators of universities regarding indoor air** 650 **quality**

651 The findings of this study, delineated in the preceding subsections, can be extrapolated to  
652 formulate recommendations for university administrators concerning indoor air quality. In  
653 certain circumstances, the implementation of a constant air current throughout the duration of  
654 room utilization can become impractical. These circumstances include instances where the

655 outside temperature is excessively low or high, or where there is an excessive amount of noise.  
656 In such situations, all rooms lacking mechanical ventilation systems should be regarded as  
657 potentially hazardous, as their air quality is likely to be substandard unless adequate ventilation  
658 is ensured by opening doors and windows between classes. To address this concern, it is  
659 recommended that each room be equipped with a sign instructing students and faculty to open  
660 windows and doors for at least five minutes between classes. The volumes and dimensions of  
661 all affected rooms should be documented for future reference. The university should define a  
662 strategy to reorganize courses so that eventually no course will be held in a room with less than  
663  $15 \text{ m}^3/\text{occupant}$ .

664 The clean air flow of all rooms with mechanical ventilation should be estimated at least once a  
665 year, preferably using the  $\text{CO}_2$  decay model. This can be organized at relatively low cost by  
666 applying the principles of the "participatory campaign" used in this study. All air handling units  
667 that cannot guarantee at least  $25 \text{ m}^3/\text{h}/\text{occupant}$  should be checked immediately and repaired if  
668 possible. In a first phase, the university should define a strategy to reorganize courses in such  
669 a way that eventually no course will be held in a room with a clean air flow of less than  $25$   
670  $\text{m}^3/\text{h}/\text{occupant}$  (in a second phase, the target should be set at  $50 \text{ m}^3/\text{h}/\text{occupant}$ ).

671 Defining these strategies to improve the indoor air quality in universities is all the more  
672 important in countries where legislation is relatively less protective. French legislation is  
673 currently one of the least protective in Europe in terms of minimum ventilation rates ( $25$   
674  $\text{m}^3/\text{h}/\text{occupant}$  in France, while the minimum legal value in Europe is  $20 \text{ m}^3/\text{h}/\text{occupant}$  and  
675 the maximal legal value is  $90 \text{ m}^3/\text{h}/\text{occupant}$ ) [31]. As was already mentioned, HCSP  
676 recommends to target a maximum concentration of  $\text{CO}_2$  of  $800 \text{ ppm}$  (while the legal threshold  
677 is  $1,300 \text{ ppm}$ ), and a minimum flow of clean air of  $50 \text{ m}^3/\text{h}/\text{occupant}$  (while the legal threshold  
678 is  $25 \text{ m}^3/\text{h}/\text{occupant}$ ). Universities should therefore prepare to upcoming more demanding legal  
679 prescription in terms of Interior Air Quality.

## 680 **5 Conclusion**

681 This study has shown that it is useful and easy to mobilize teachers to measure  $\text{CO}_2$   
682 concentrations in the rooms of a university, in order to characterize risk situations. The study  
683 shows that rooms without mechanical ventilation are hazardous to the health of their occupants  
684 when they are used with openings closed and without complying with the legal minimum  
685 volume of  $15 \text{ m}^3/\text{occupant}$ . For rooms without mechanical ventilation, the study confirms that  
686 clean air flows below the legal threshold of  $25 \text{ m}^3/\text{h}/\text{occupant}$  are insufficient to guarantee the  
687 quality of indoor air, and therefore the health of their occupants. The finding that the majority  
688 of the rooms under study did not comply with the legal requirements suggests that this  
689 problematic situation may also be present in a significant proportion of rooms at the university  
690 surveyed. Our study demonstrated the ease and simplicity of implementing the method for  
691 characterizing the ventilation performance of an amphitheater, which consists of measuring the  
692 decrease in  $\text{CO}_2$  after the amphitheater has been evacuated and the doors closed. This method  
693 could be implemented very quickly and easily to characterize the ventilation performance of  
694 all the rooms in the university that have mechanical ventilation. With the political will of the  
695 administration, it would be possible to characterize the ventilation in all these rooms in just a  
696 few months. However, compliance with the legal threshold of  $25 \text{ m}^3/\text{occupant}/\text{h}$ , and even more  
697 so with the target of  $50 \text{ m}^3/\text{occupant}/\text{h}$ , will necessarily involve substantial investment and will  
698 take time. In the meantime, it will be necessary to work on the use of the most problematic  
699 rooms, so as to be able to reduce their gauge. Given the university's shortage of rooms, this is

700 a considerable challenge. To address this issue, it is essential to quantify the problem precisely.  
701 The method proposed here is a promising approach for achieving this objective.

## 702 **Data Availability**

703 The data used to support the findings of this study are available from the corresponding author  
704 upon request.

## 705 **Conflicts of Interest**

706 The author declares that there is no conflict of interest regarding the publication of this paper.

## 707 **Funding Statement**

708 The 4 Aranet4 CO<sub>2</sub> sensors were funded by SNESUP-FSU union. The author is an employee  
709 of University Grenoble Alpes (France).

## 710 **Acknowledgments**

711 This study would not have been possible without the involvement of the SNESUP-FSU union,  
712 who funded the sensors and advertised the study, and without the involvement of 20 lecturers  
713 and researchers from Grenoble Alpes University, who volunteered for the participatory  
714 campaign described here: we would like to extend our warmest thanks to them. The author is  
715 grateful to Romain Guichard (Laboratoire d'Aéraulique, VentilAtion, Thermique et qualité  
716 d'AiR, INRS) for his advice on modelling CO<sub>2</sub> concentrations in rooms and for his careful  
717 proofreading of the article, as well as to the members of the CO<sub>2</sub> project <https://projetco2.fr/>  
718 (Pascal Morenton, Benoît Semin) for advice on CO<sub>2</sub> measurement methods and for certain  
719 bibliographical references.

## 720 **References**

721

- [1] C. Wang, K. A. Prather, J. Sznitman and al., "Airborne transmission of respiratory viruses," *Science*, vol. 373, no. 6558, doi:10.1126/science.abd9149, 2021.
- [2] T. Greenhalgh, J. L. Jimenez, K. A. Prather and al., "Ten scientific reasons in support of airborne transmission of SARS-CoV-2," *Lancet*, vol. 397, no. 10285, doi:10.1016/S0140-6736(21)00869-2, 2021.
- [3] C. R. Du, S. C. Wang, M. C. Yu and al., "Effect of ventilation improvement during a tuberculosis outbreak in underventilated university buildings," *Indoor Air*, vol. 3, pp. 422-432, doi:10.1111/ina.12639, 2020.
- [4] S. Zhu, S. Jenkins, K. Addo and al., "Ventilation and laboratory confirmed acute respiratory infection (ARI) rates in college residence halls in College Park, Maryland," *Environment International*, vol. 137 doi:10.1016/j.envint.2020.105537, 2020.
- [5] G. Buonanno, L. Ricolfi, L. Morawska and al., "Increasing ventilation reduces SARS-CoV-2 airborne transmission in schools: A retrospective cohort study in Italy's Marche region," *Front Public Health*, vol. 10, no. 1087087, doi: 10.3389/fpubh.2022.1087087, 2022.

- [6] A. Persily, W. P. Bahnfleth, H. Kipen, H. and al., "ASHRAE position document on Indoor Carbon Dioxide," 2 February 2022. [Online]. Available: [https://www.ashrae.org/file%20library/about/position%20documents/pd\\_indoorcarbon\\_dioxide\\_2022.pdf](https://www.ashrae.org/file%20library/about/position%20documents/pd_indoorcarbon_dioxide_2022.pdf).
- [7] Z. Peng and J. L. Jimenez, "Exhaled CO<sub>2</sub> as a COVID-19 Infection Risk Proxy for Different Indoor Environments and Activities," *Environmental Science & Technology Letters*, vol. 8, no. 5, pp. 392-397, doi: 10.1021/acs.estlett.1c00183, 2021.
- [8] A. Haddrell, H. Oswin, M. Otero-Fernandez and al., "Ambient carbon dioxide concentration correlates with SARS-CoV-2 aerostability and infection risk," *Nat Commun*, vol. 15, no. 3487, doi:10.1038/s41467-024-47777-5, 2024.
- [9] C. A. Redlich, J. Sparer and M. R. Cullen, "Sick-building syndrome," *Lancet*, vol. 1013, no. 1, doi:10.1016/S0140-6736(96)07220-0, 1997.
- [10] X. Zhang, P. Wargocki, Z. Lian and al., "Effects of Exposure to Carbon Dioxide and Bioeffluents on Perceived Air Quality, Self- assessed Acute Health Symptoms and Cognitive Performance," *Indoor Air*, vol. 27, no. 1, doi: 10.1111/ina.12284, 2017.
- [11] K. Azuma, N. Kagi, U. Yanagi and al., "Effects of low-level inhalation exposure to carbon dioxide in indoor T environments: A short review on human health and psychomotor performance," *Environment International*, vol. 121, pp. 51–56, doi:10.1016/j, 2018.
- [12] J. Palacios, K. Steele, Z. Tan and al., "Human health and productivity outcomes of office workers associated with indoor air quality: A systematic review," *MIT Center for Real Estate Research Paper*, vol. 21, no. 14, doi:10.2139/ssrn.3881998, 2021.
- [13] (France), High Council for Public Health, "Covid-19: aeration, ventilation and CO<sub>2</sub> measurement in buildings open to the public," <https://www.hcsp.fr/Explore.cgi/AvisRapportsDomaine?clefr=1009>, 2021.
- [14] (France), High Council for Public Health, "Notice concerning the measurement of carbon dioxide in indoor air in buildings open to the public," <https://www.hcsp.fr/explore.cgi/avisrapportsdomaine?clefr=1154>, 2022.
- [15] (France), High Council for Public Health, "Notice concerning the aeration, ventilation, hygiene and use of premises to prevent infectious risks in exceptional epidemic situations," <https://www.hcsp.fr/explore.cgi/avisrapportsdomaine?clefr=13>, 2023.
- [16] A. Mundackal and V. M. Ngole-Jeme, "Evaluation of indoor and outdoor air quality in university academic buildings and associated health risk," *International Journal of Environmental Health Research*, vol. 32, no. 5, doi: 10.1080/09603123.2020.1828304, pp. 1-19, 2022.
- [17] V. Faye McNeill, R. Corsi, J. A. Huffman et al., «Room-level ventilation in schools and universities,» *Atmospheric Environment X*, vol. 100152, doi: 10.1016/j.aeaoa.2022.100152, 2022.
- [18] (France), French Ministry of the Environment,, "Decree setting the conditions for carrying out direct-reading measurements of carbon dioxide concentration in indoor air as part of the annual assessment of ventilation systems," <https://www.legifrance.gouv.fr/jorf/id/JORFTEXT000046830005>, 2022.
- [19] N. Ma, D. Aviv, H. Guo and al., "Measuring the right factors: A review of variables and models for thermal comfort and indoor air quality," *Renewable and Sustainable Energy Reviews*, Vols. 135, doi:10.1016/j.rser.2020.110436, 2021.
- [20] W. F. de Gid, «CO<sub>2</sub> as indicator for the indoor air quality. General principles,» Ventilation Information Paper n° 33, Air Infiltration and Ventilation Centre,

[https://www.aivc.org/sites/default/files/members\\_area/medias/pdf/VIP/VIP%2033\\_CO2%20General.pdf](https://www.aivc.org/sites/default/files/members_area/medias/pdf/VIP/VIP%2033_CO2%20General.pdf), 2010.

- [21] J. Blunden, T. Boyer and E. Bartow-Gillies, "State of the Climate in 2022," *Bull. Amer. Meteor. Soc.*, vol. 104, no. 9, pp. Si–S501, doi:10.1175/2023BAMSStateoftheClimate.1, 2023.
- [22] G. Pei, D. Rim, S. Schiavon and al., "Effect of sensor position on the performance of CO<sub>2</sub>-based demand controlled ventilation," *Energy and Buildings*, vol. 202, doi:10.1016/j.enbuild.2019.109358, 2019.
- [23] E. Bjorn and P. V. Nielsen, "Dispersal of exhaled air and personal exposure in displacement ventilated rooms," *Indoor Air*, vol. 12, pp. 147–164, doi:10.1034/j.1600-0668.2002.08126.x, 2002.
- [24] A. Bulinska, Z. Popiolek and Z. Bulinski, "Experimentally validated CFD analysis on sampling region determination of average indoor carbon dioxide concentration in occupied space," *Building and Environment*, vol. 71, pp. 319–331, doi:10.1016/j.2014.
- [25] G. Buonanno, L. Stabile and L. Morawska, "Estimation of airborne viral emission: Quanta emission rate of SARS-CoV-2 for infection risk assessment," *Environment International*, doi:10.1016/j.envint.2020.105794, 2020.
- [26] B. Moseley, J. Archer, C. M. Orton and al., "Relationship between Exhaled Aerosol and Carbon Dioxide Emission Across Respiratory Activities," *Environmental Science & Technology*, vol. 58, no. 34, doi:10.1021/acs.est.4c01717, 2024.
- [27] A. Persily and L. de Jonge, "Carbon dioxide generation rates for building occupants," *Indoor Air*, Vols. 27, doi: 10.1111/ina.12383, p. 868–879, 2017.
- [28] «Standard Guide on the Relationship of Indoor Carbon Dioxide Concentrations to Indoor Air Quality and Ventilation. ASTM D6245-24,» Grenoble <https://www.astm.org/standards/d6245/>, 2024.
- [29] U. Satish, M. Mendell, S. J and al., "Is CO<sub>2</sub> an Indoor Pollutant? Direct Effects of Low-to-Moderate CO<sub>2</sub> Concentrations on Human Decision-Making Performance," *Environmental Health Perspectives*, vol. 120, no. 12, doi: 10.1289/ehp.1104789, 2012.
- [30] Occupational Safety and Health Administration, "Permissible Exposure Limits – Annotated Tables," <https://www.osha.gov/annotated-pels/table-z-1>, 2021.
- [31] N. Brelih, "Ventilation rates and IAQ in national regulations," *REHVA Journal*, [https://www.rehva.eu/fileadmin/hvac-dictio/01-2012/ventilation-rates-and-iaq-in-national-regulations\\_rj1201.pdf](https://www.rehva.eu/fileadmin/hvac-dictio/01-2012/ventilation-rates-and-iaq-in-national-regulations_rj1201.pdf), 2012.

722

723

724

725

726

## **Concise description of Supplementary figures and tables**

727 **Table SM.1.** Summary of measurements in the 15 rooms without mechanical ventilation.

728

729 **Figure SM.1** Photos from the front and rear, and dimensions, of room Xa. This is a room  
730 without mechanical ventilation where CO<sub>2</sub> concentrations above 5,000 ppm were frequently  
731 recorded. This room has a gauge of 154 occupants, an area of 128 m<sup>2</sup>, and a volume of 434 m<sup>3</sup>

## Indoor Air quality at a French university

732 (2.8 m<sup>3</sup>/occupant). The lower windows cannot be opened. The upper windows can only be  
733 partially opened, so that the maximum opening area of the windows is 2.7 m<sup>2</sup>.

734

735

736 **Figure SM.2** Photos from the front and rear, and dimensions, of room Vc. This room with  
737 mechanical ventilation had problems with its air handling unit, leading to concentrations of  
738 CO<sub>2</sub> above 10,000 ppm. This room has a gauge of 335 occupants, an area of 255 m<sup>2</sup>, and a  
739 volume of 990 m<sup>3</sup>.





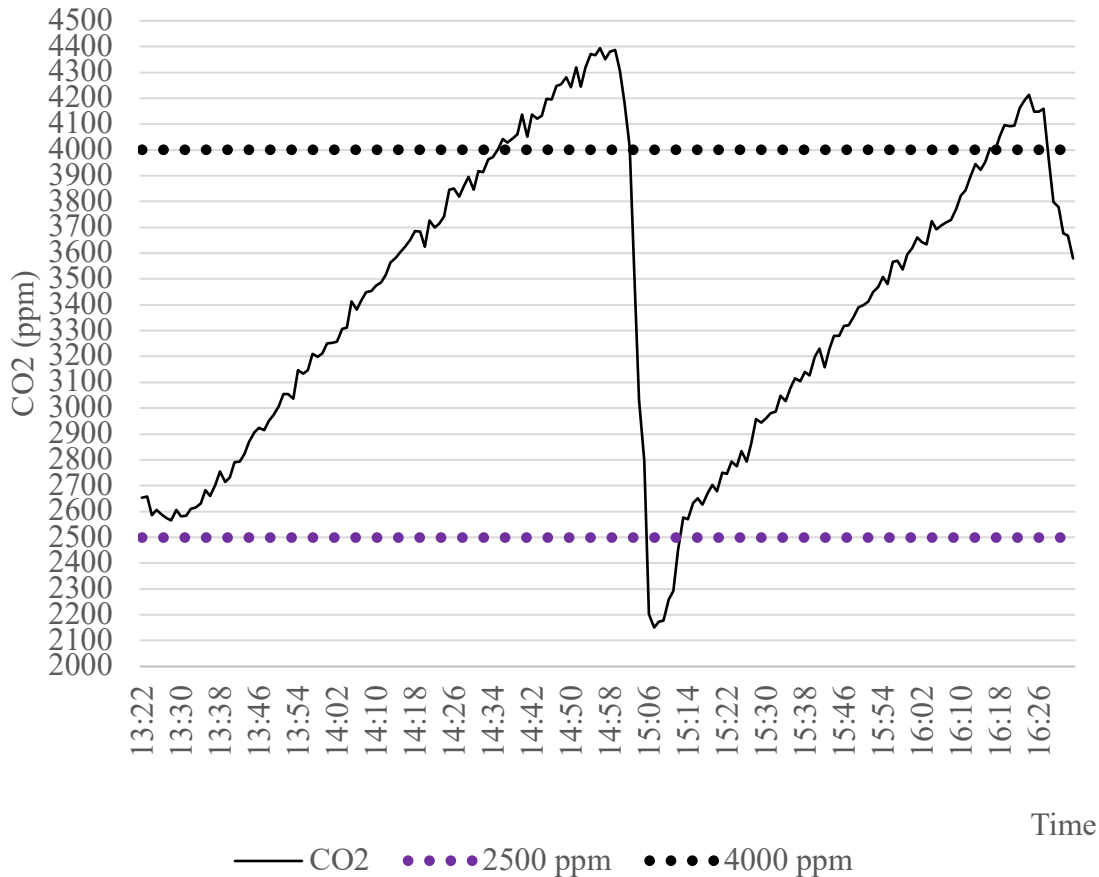

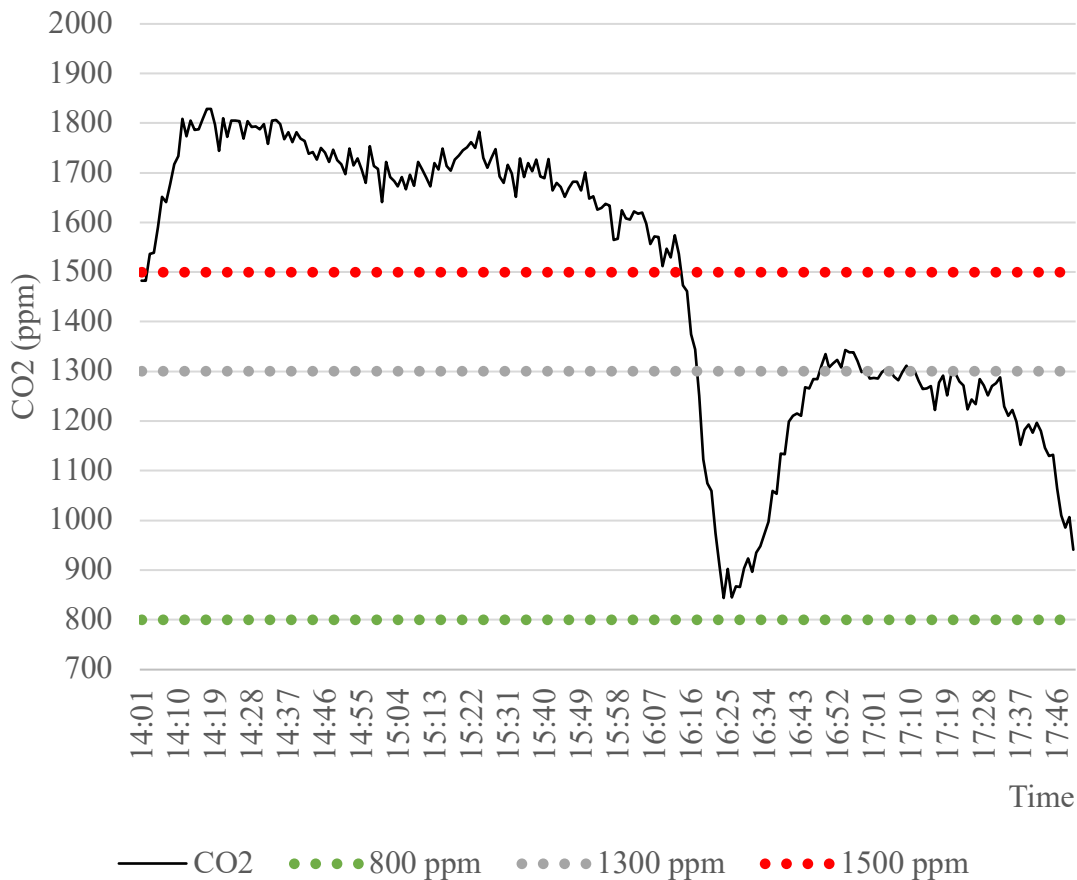

— CO2    ●●●● 800 ppm    ●●●● 1300 ppm    ●●●● 1500 ppm

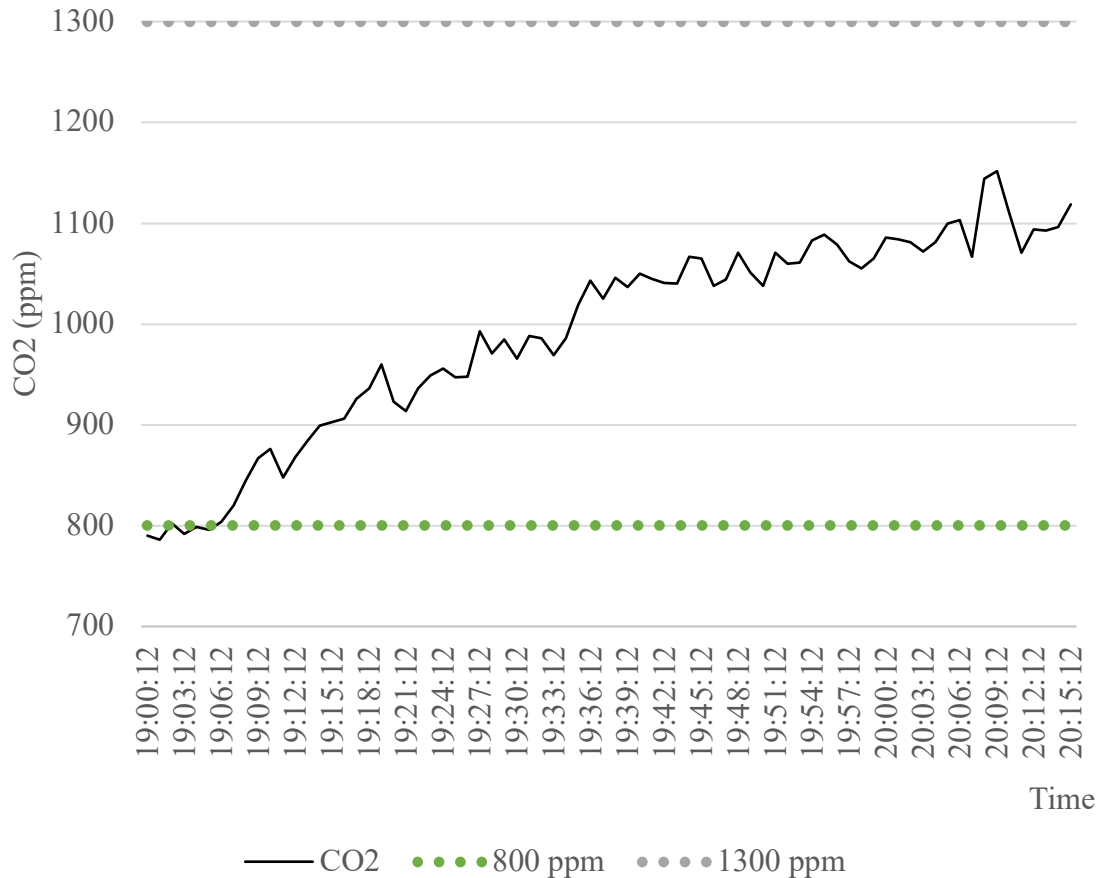

— CO2    ●●●● 800 ppm    ●●●● 1300 ppm

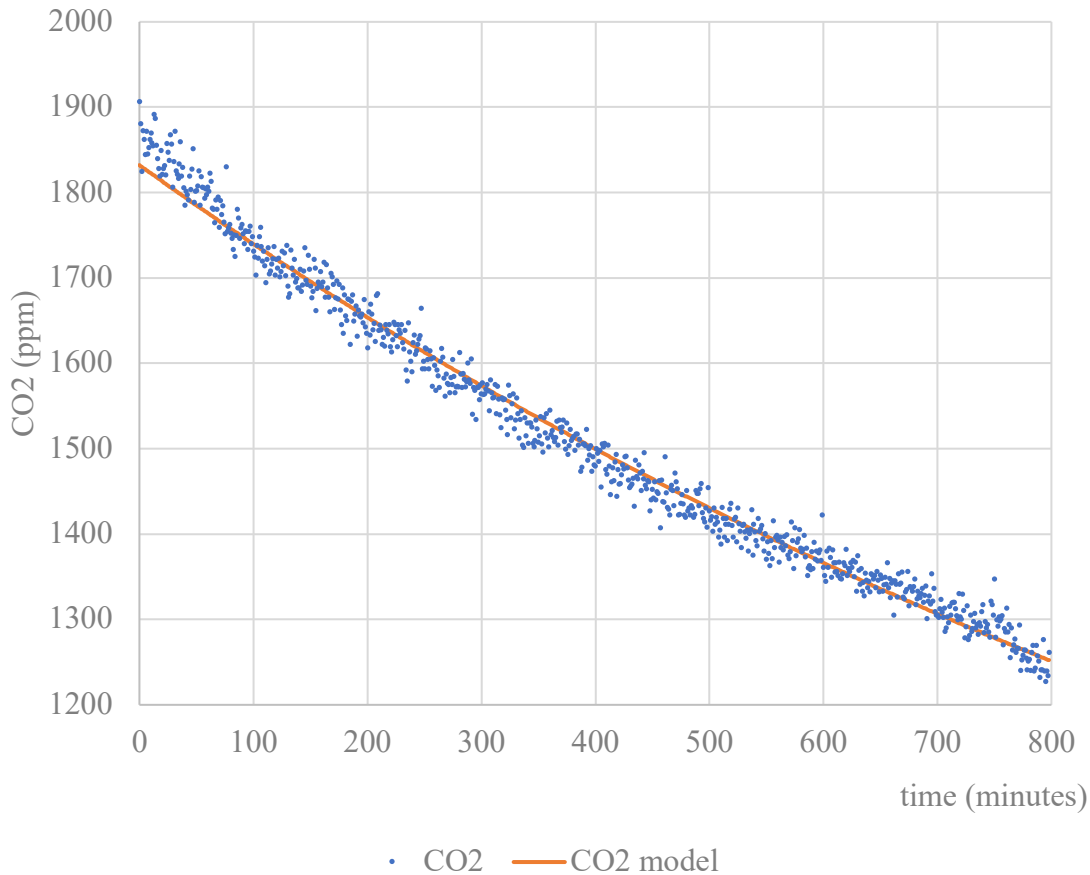

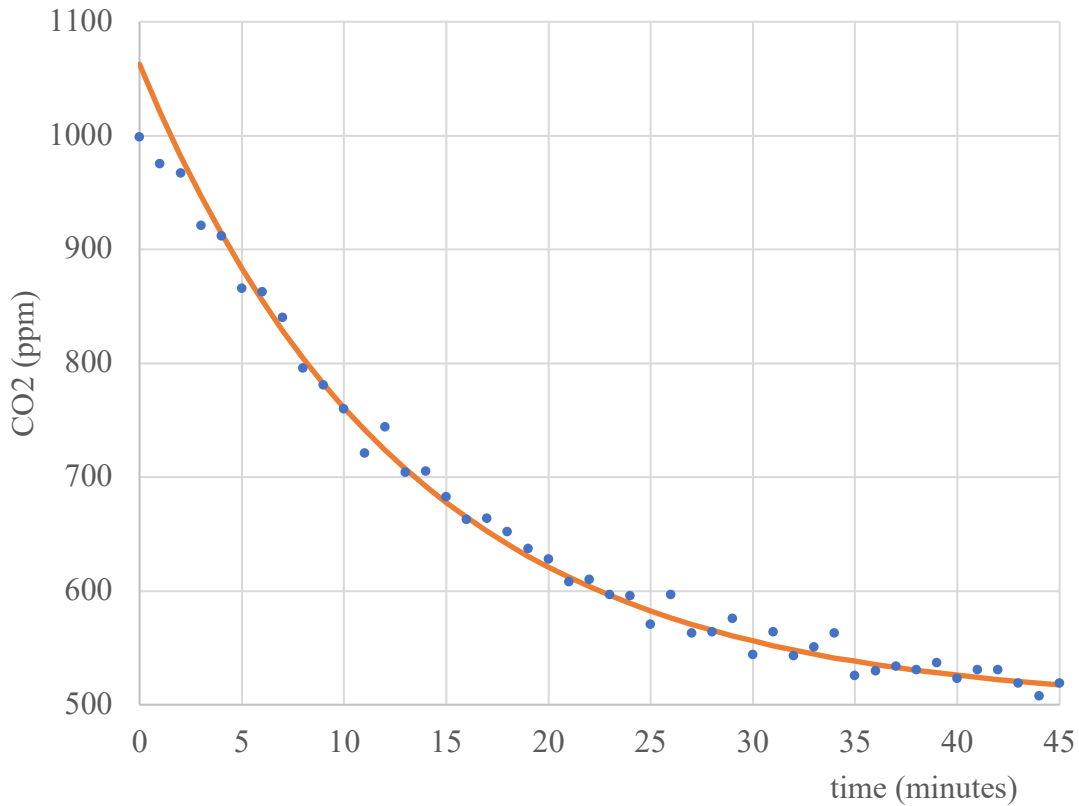

• CO2 — CO2 model



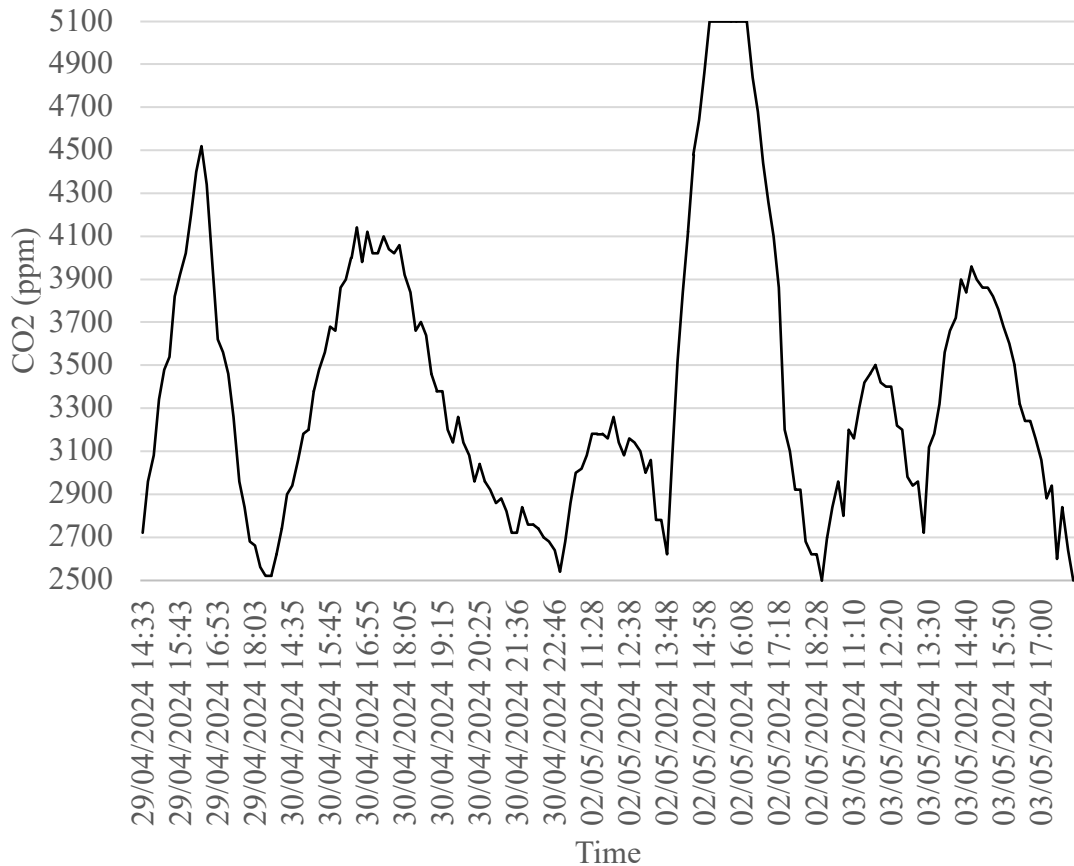

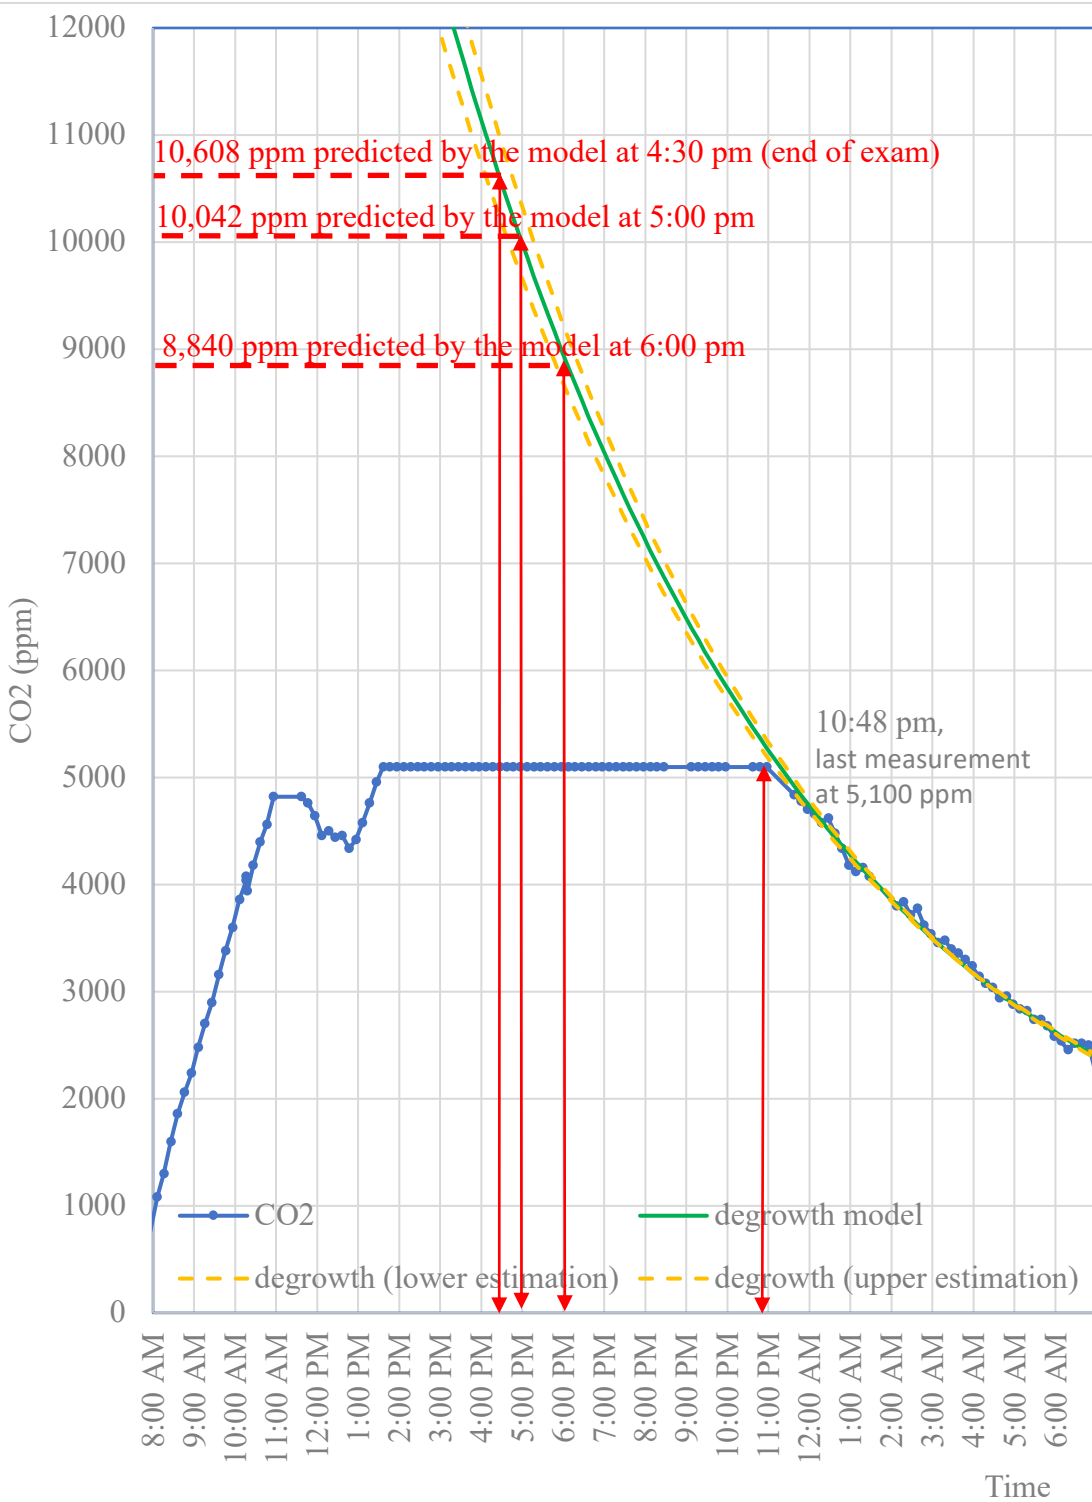

Time
